# Supplementary material for: LncRNA-CR11538 Decoys Dif/Dorsal to Reduce Antimicrobial Peptide Products for Restoring Drosophila Toll Immunity Homeostasis
Source: MDPI journal article supplement (doi:10.3390/ijms221810117), 2021-09-18
Supplement: s1 [file s1]

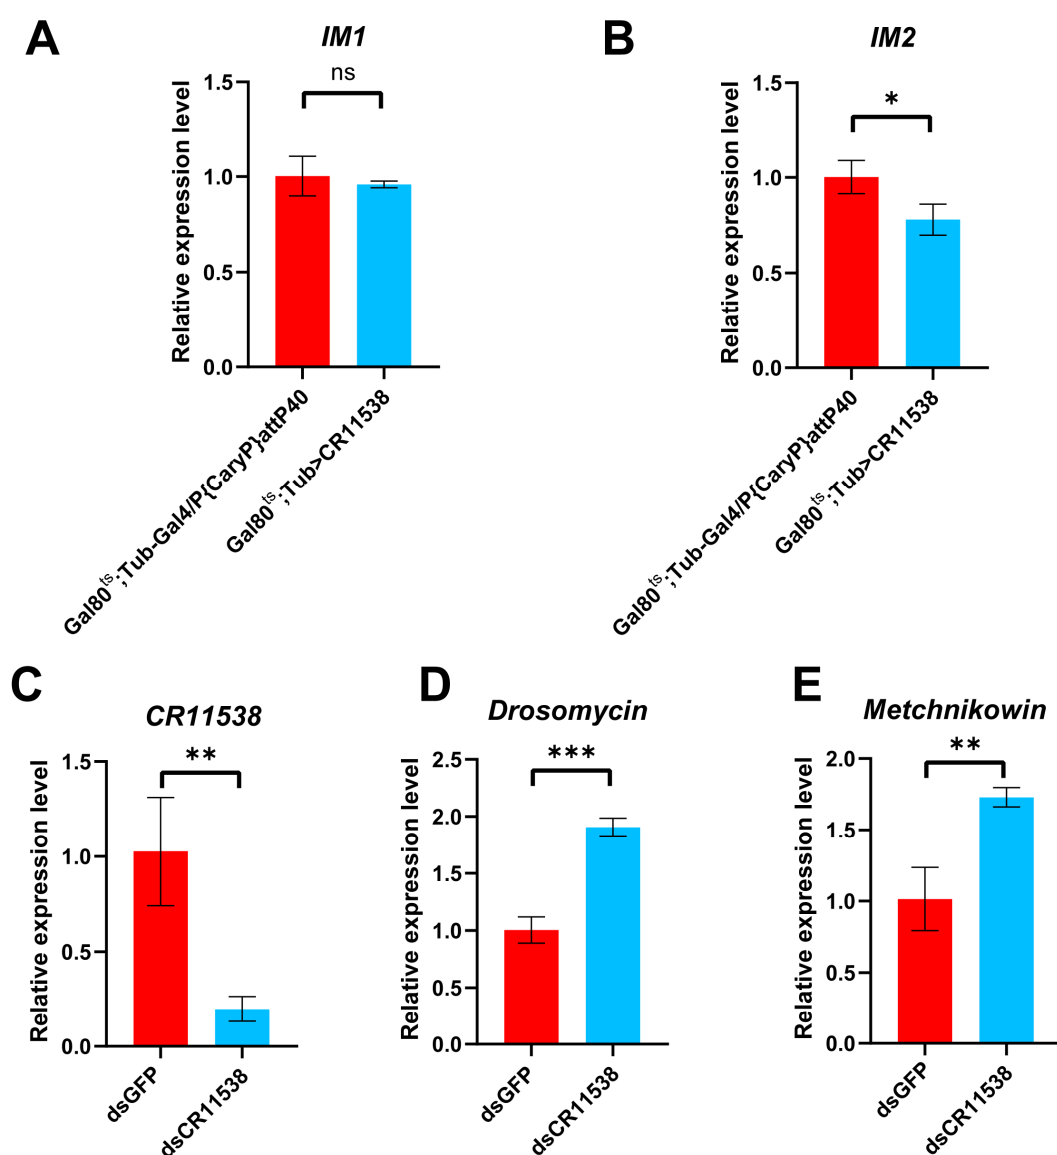

Figure S1: Figure S1: The expression levels of *IM1* (A), *IM2* (B), in control flies and the CR11538-overexpressing flies were measured at 6h after *M. luteus* infection. The expression levels of *lncRNA-CR11538* (C), *Drs*(D), *Mtk*(E) in control flies and the dsRNA-mediated *lncRNA-CR11538* knockdown flies were measured at 6h after *M. luteus* infection. For all tests, *P* value < 0.05 was considered as statistically significant. \* *P* < 0.05; \*\* *P* < 0.01, \*\*\* *P* < 0.001 and ns, no significance vs. the control groups

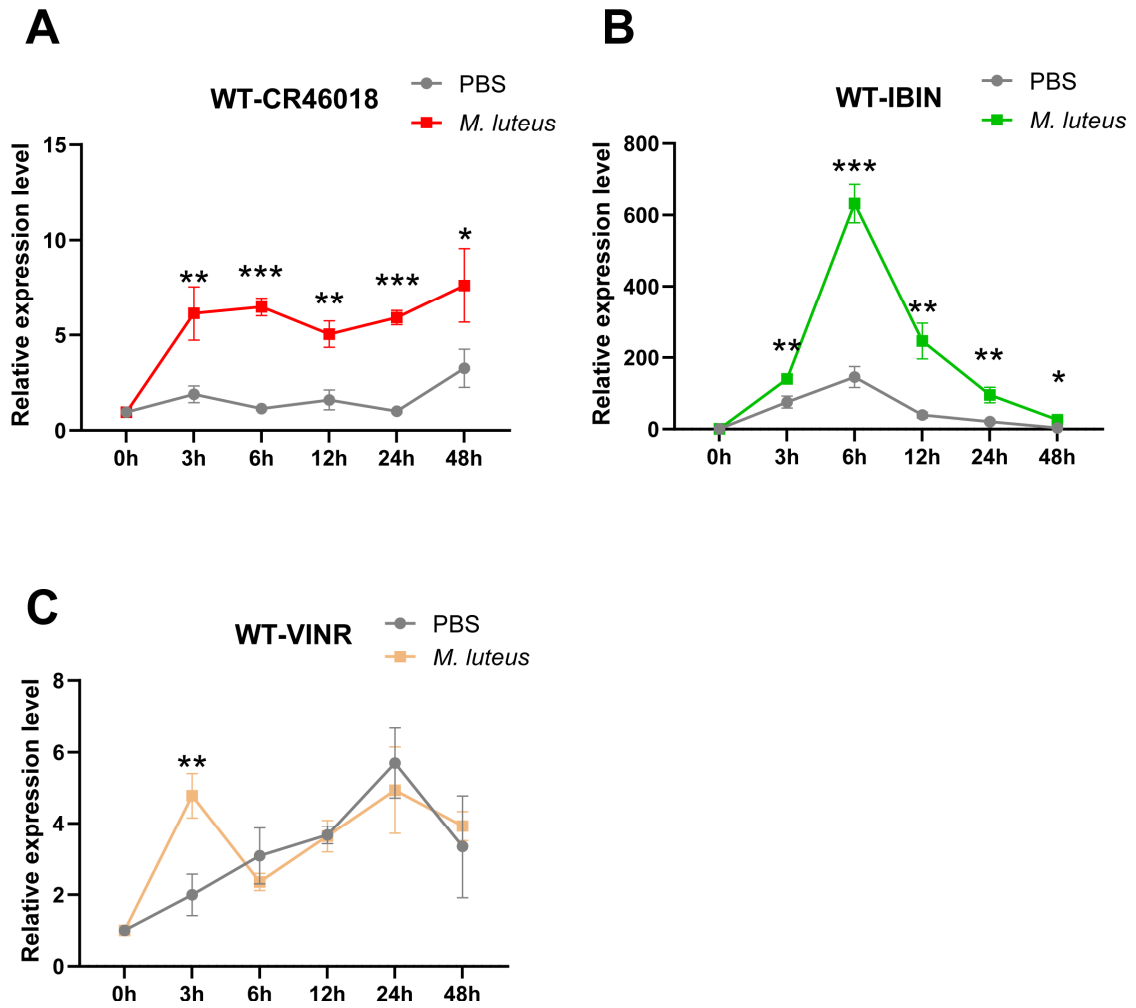

Figure S2: The dynamic expression levels of *lncRNA-CR46018* (A), *IBIN*(B), *VINR* (C) in the wild-type *Drosophila* infected with *M. luteus* were detected by qRT-PCR at 0 h, 3 h, 6 h, 12 h, 24 h and 48 h after stimulation. For all tests,  $P$  value  $< 0.05$  was considered as statistically significant. \*  $P < 0.05$ ; \*\*  $P < 0.01$  and \*\*\*  $P < 0.001$  vs. the control groups.
