# Supplementary material for: LncRNA-CR11538 Decoys Dif/Dorsal to Reduce Antimicrobial Peptide Products for Restoring Drosophila Toll Immunity Homeostasis
Source: MDPI journal article supplement (doi:10.3390/ijms221810117), 2021-09-18
Supplement: s1 [file s1]

### Supplementary Table S1. Primers used for transgene vector

#### construction:

| Name                     | Primer sequence(5' – 3')     |
|--------------------------|------------------------------|
| pUAST-attB-CR115<br>38-F | CGGAATTCATGGAAGATCTTCACGTCGA |
| pUAST-attB-CR115<br>38-R | CGCTCGAGAACTGGATCTTCCAGCTGCT |
| pAc-CR11538-F            | CGGAATTCATGGAAGATCTTCACGTCGA |
| pAc-CR11538-R            | CGCTCGAGAACTGGATCTTCCAGCTGCT |
| pUAST-attB-F             | GTTCGGAGTGATTAGCGT           |
| pUAST-attB-R             | TGTTGAGAGTCAGCAGTAGC         |
