# Supplementary material for: LncRNA-CR11538 Decoys Dif/Dorsal to Reduce Antimicrobial Peptide Products for Restoring Drosophila Toll Immunity Homeostasis
Source: MDPI journal article supplement (doi:10.3390/ijms221810117), 2021-09-18
Supplement: s1 [file s1]

**Supplementary Table S2. Primers used for quantitative RT-PCR :**

| Name       | Primer sequence(5' – 3') |
|------------|--------------------------|
| rp49-qF    | GACGCTTCAAGGGACAGTATCTG  |
| rp49-qR    | AAACGCGGTTCTGCATGAG      |
| Drs-qF     | GTTCGCCCTCTTCGCTGTCC     |
| Drs-qR     | CCACTGGAGCGTCCCTCCTC     |
| Mtk-qF     | CGTCGCCCTTCAATCCTA       |
| Mtk-qR     | CGACATCAGCAGTGTGAATTT    |
| GAPDH-qF   | TAAATTCGACTCGACTCACGGT   |
| GAPDH-qR   | CTCCACCACATACTCGGCTC     |
| CR11538-qF | GCCATACCAAGATCAATCCTACA  |
| CR11538-qR | GCTTCACCTAACCACCAGTT     |
| U6-qF      | CTTCGGCAGAACATATACTAA    |
| U6-qR      | ATTTTGCGTGTCAATCCTT      |
| Dorsal-qF  | ATCCGTGTGGATCCGTTTAA     |
| Dorsal-qR  | AATCGCACCGAATTCAGATC     |
| Dif-qF     | ATGTTTGAGGAGGCTTTTCGG    |
| Dif-qR     | GAACCGGCGGTGCGACCCTCGC   |
