# Supplementary material for: LncRNA-CR11538 Decoys Dif/Dorsal to Reduce Antimicrobial Peptide Products for Restoring Drosophila Toll Immunity Homeostasis
Source: MDPI journal article supplement (doi:10.3390/ijms221810117), 2021-09-18
Supplement: s1 [file s1]

**Supplementary Table S3. Primers used for ChIP-qPCR:**

| Name            | Primer sequence(5' – 3') |
|-----------------|--------------------------|
| ChIP-Mtk-pro-qF | GTTTTCGTGGGAGGTGGAGA     |
| ChIP-Mtk-pro-qR | GAATGAATGACGGGCAAGTGT    |
| ChIP-Drs-pro-qF | AATGCTTTTCGCTTACGCTTTTCG |
| ChIP-Drs-pro-qR | GACTTGTGGCTTGGGAACCTCG   |
