# Supplementary material for: LncRNA-CR11538 Decoys Dif/Dorsal to Reduce Antimicrobial Peptide Products for Restoring Drosophila Toll Immunity Homeostasis
Source: Int J Mol Sci. 2021 Sep 18;22(18):10117. doi: 10.3390/ijms221810117 (PMC8468853; doi:10.3390/ijms221810117)
Supplement: Supplementary file 1 [file ijms-22-10117-s001.zip]

Archive with 5 entries (5 files):
- Supplementary Table S2.pdf
- Supplementary Table S3.pdf
- Supplementary Table S4.xlsx
- ijms-1366115-Figure S1 and Figure S2.pdf
- Supplementary Table S1.pdf
