# Supplementary material for: LncRNA-CR11538 Decoys Dif/Dorsal to Reduce Antimicrobial Peptide Products for Restoring Drosophila Toll Immunity Homeostasis
Source: Int J Mol Sci. 2021 Sep 18;22(18):10117. doi: 10.3390/ijms221810117 (PMC8468853; doi:10.3390/ijms221810117)
Supplement: Supplementary file 1 [file ijms-22-10117-s001.zip › Supplementary Table S4.xlsx]

## Sheet: M_11538vsM_25C_deg_up
gene_id	M11538_1	M11538_2	M11538_3	M25C_1	M25C_2	M25C_3	M_11538	M_25C	log2FoldChange	pvalue	padj	gene_name	gene_chr	gene_start	gene_end	gene_strand	gene_length	gene_biotype	gene_description	tf_family
FBgn0036597	2610.39	2794.79	2070.28	114.564	175.902	169.449	2491.82	153.305	4.02433	1.4543e-148	1.05415e-144	CG4962	3L	16294711	16295547	-	774	protein_coding	-	-
FBgn0017424	2327.01	3317.39	3201.1	4.85439	1.95447	5.32858	2948.5	4.04581	9.52123	8.89132e-105	4.29658e-101	CR11538	3L	12129103	12131488	-	2386	lincRNA	-	-
FBgn0039480	602.32	525.566	298.654	22.3302	16.613	18.1172	475.513	19.0201	4.6419	9.2484e-58	3.35185e-54	Cpr97Ea	3R	27083130	27087778	-	1781	protein_coding	-	Chitin_bind_4
FBgn0032538	4870.36	4117.59	2710.11	190.292	162.221	122.557	3899.36	158.357	4.62106	8.05859e-51	1.66893e-47	CG16885	2L	13932559	13934692	-	1333	protein_coding	-	-
FBgn0020765	8705.7	6924.23	5043.29	55.34	31.2715	12.7886	6891.07	33.1334	7.69692	2.1732e-41	2.10033e-38	Acp65Aa	3L	6152050	6152745	-	615	protein_coding	-	Chitin_bind_4
FBgn0263132	853.202	734.014	446.531	104.855	85.9967	99.1117	677.916	96.6544	2.81005	1.15033e-40	9.80963e-38	Cht6	X	10016845	10050803	+	16205	protein_coding	-	CBM_14
FBgn0040900	623.65	523.59	360.511	85.4372	75.2471	78.863	502.584	79.8491	2.65325	5.03447e-39	3.8413e-36	CG17777	X	2186855	2187741	+	680	protein_coding	-	-
FBgn0033999	1010.64	862.442	753.883	204.855	251.149	165.186	875.654	207.064	2.07801	6.74211e-39	4.88702e-36	CG8093	2R	15214060	15215686	-	1555	protein_coding	-	-
FBgn0052198	186.892	294.396	269.658	4.85439	5.86341	2.13143	250.315	4.28308	5.85089	2.88538e-38	1.94118e-35	CG32198	3L	18526976	18527445	+	470	protein_coding	-	-
FBgn0040837	489.575	766.615	860.2	117.476	128.018	138.543	705.464	128.012	2.46365	8.71483e-38	5.26412e-35	CG8620	3L	7158099	7158874	+	776	protein_coding	-	-
FBgn0036738	2887.68	2655.49	2453.02	1024.28	1166.82	965.539	2665.4	1052.21	1.34043	9.09911e-38	5.27639e-35	CG7542	3L	17549826	17550980	+	1155	protein_coding	-	Trypsin
FBgn0031000	177.75	274.638	267.725	3.88351	6.84065	1.06572	240.038	3.92996	5.90681	2.90344e-36	1.61889e-33	Muc18B	X	19215515	19216660	+	1146	protein_coding	-	-
FBgn0030703	5539.72	4634.27	3842.87	1680.59	1601.69	1632.68	4672.29	1638.32	1.51181	8.00124e-36	4.29608e-33	MSBP	X	15887567	15890109	-	1503	protein_coding	-	-
FBgn0051354	420.506	680.667	728.754	88.3498	120.2	70.3373	609.976	92.9623	2.71159	2.18133e-35	1.09044e-32	Hsp70Bbb	3R	12502510	12504856	+	2347	protein_coding	-	HSP70
FBgn0035844	469.261	365.525	212.634	35.9225	33.226	23.4458	349.14	30.8647	3.49447	3.26162e-35	1.57612e-32	CG13676	3L	8141868	8151813	-	3575	protein_coding	-	CBM_14
FBgn0024989	1025.87	796.252	499.689	139.806	109.45	135.346	773.938	128.201	2.59391	6.50728e-34	3.0431e-31	CG3777	X	279703	350504	+	4316	protein_coding	-	-
FBgn0035512	190.955	259.819	151.743	3.88351	8.79512	3.19715	200.839	5.29192	5.23307	7.56444e-34	3.42693e-31	Cpr64Ac	3L	4211964	4212915	-	890	protein_coding	-	Chitin_bind_4
FBgn0260479	5539.72	4391.24	2737.18	233.981	167.107	124.689	4222.71	175.259	4.58988	9.86567e-34	4.33402e-31	CG31904	2L	7734415	7738809	-	3572	protein_coding	-	SNF
FBgn0036881	2214.26	2015.33	1298.03	500.002	339.101	380.461	1842.54	406.521	2.17981	1.11706e-33	4.76294e-31	Cpr76Bd	3L	19532743	19538289	+	4525	protein_coding	-	Chitin_bind_4
FBgn0004577	317.919	250.928	168.174	26.2137	21.4992	13.8543	245.674	20.5224	3.57268	3.671e-33	1.52053e-30	Pxd	3R	17014576	17027987	+	2630	protein_coding	-	An_peroxidase
FBgn0036985	847.107	809.095	465.861	133.981	146.585	122.557	707.355	134.375	2.39498	7.26224e-33	2.92446e-30	zye	3L	20413604	20424309	+	7031	protein_coding	-	-
FBgn0001311	1107.13	1034.34	676.562	245.632	223.787	234.458	939.343	234.625	2.00096	1.39122e-32	5.30359e-30	kkv	3R	5378093	5392866	-	5701	protein_coding	-	-
FBgn0267755	182.829	185.726	182.672	17.4758	16.613	28.7744	183.742	20.9544	3.14314	1.42678e-32	5.30359e-30	CR46086	3R	27503393	27504101	-	709	lincRNA	-	-
FBgn0028544	3789.64	2647.59	1766.79	149.515	95.769	89.5202	2734.67	111.601	4.61417	3.74502e-32	1.35729e-29	CG16884	2L	13944756	13947476	-	1413	protein_coding	-	-
FBgn0038348	181.813	265.747	232.931	37.8642	22.4764	26.6429	226.83	28.9945	2.96574	1.67126e-31	5.76865e-29	AOX2	3R	15537713	15542414	-	3950	protein_coding	-	-
FBgn0030763	806.479	654.982	408.837	116.505	118.245	112.966	623.432	115.906	2.42658	2.6799e-31	8.82966e-29	CG9782	X	16615028	16621589	-	1406	protein_coding	-	-
FBgn0036717	331.123	292.42	143.045	21.3593	18.5675	9.59145	255.529	16.5061	3.94196	6.51905e-31	2.10015e-28	CG13731	3L	17383636	17388956	-	2980	protein_coding	-	-
FBgn0002563	3407.73	2817.51	1513.57	123.301	78.1788	61.8116	2579.6	87.7639	4.87622	9.33284e-30	2.94127e-27	Lsp1beta	2L	898500	901316	+	2749	protein_coding	-	-
FBgn0040637	1267.61	1225.99	792.544	289.321	298.057	201.42	1095.38	262.933	2.05694	1.44531e-29	4.45801e-27	CG11458	3L	20905795	20906331	+	537	protein_coding	-	-
FBgn0042207	259.008	261.795	335.381	48.5439	70.3609	47.9573	285.395	55.6207	2.35723	2.15412e-29	6.5059e-27	CG18530	3R	12633359	12634670	+	1188	protein_coding	-	-
FBgn0004034	255.96	216.351	143.045	16.5049	5.86341	22.3801	205.119	14.9161	3.79314	3.10816e-29	9.19571e-27	y	X	356509	361245	+	2038	protein_coding	-	-
FBgn0026077	4161.39	3576.22	2594.13	1188.35	1173.66	1124.33	3443.91	1162.11	1.5671	1.23311e-28	3.43778e-26	Gasp	3R	6088799	6100887	-	2355	protein_coding	-	CBM_14
FBgn0010041	1402.7	2350.23	2520.68	212.622	222.81	153.463	2091.2	196.298	3.41258	1.65215e-28	4.5191e-26	GstD5	3R	12375733	12376572	+	840	protein_coding	-	GST_C
FBgn0046875	382.925	250.928	205.868	43.6895	21.4992	34.1029	279.907	33.0972	3.07964	1.83404e-28	4.92371e-26	Obp83g	3R	6111671	6112302	-	569	protein_coding	-	-
FBgn0013278	1385.44	2490.51	2287.75	95.146	153.426	168.383	2054.56	138.985	3.88663	2.67799e-28	6.94991e-26	Hsp70Bb	3R	12505793	12508139	+	2347	protein_coding	-	HSP70
FBgn0261341	3104.03	2588.31	1789.99	755.342	786.674	655.416	2494.11	732.477	1.76721	4.37188e-28	1.09274e-25	verm	3L	19690033	19695260	-	2368	protein_coding	-	CBM_14
FBgn0264077	128.996	126.452	148.844	12.6214	7.81788	5.32858	134.764	8.58929	3.95873	6.56906e-28	1.6141e-25	Cnx14D	X	16522967	16525415	-	2449	protein_coding	-	-
FBgn0030829	1549.98	1237.85	632.102	6.79614	8.79512	1.06572	1139.98	5.55232	7.66778	6.78639e-28	1.6397e-25	CG12998	X	17218667	17219787	+	1121	protein_coding	-	-
FBgn0030830	585.052	614.478	267.725	4.85439	10.7496	6.3943	489.085	7.33276	6.05746	8.8137e-28	2.09463e-25	CG5172	X	17221442	17222651	+	788	protein_coding	-	-
FBgn0010226	25910.9	23799.6	19158.3	10393.2	10264.9	10266	22956.3	10308.1	1.1551	2.03825e-27	4.61695e-25	GstS1	2R	17093246	17099501	-	2275	protein_coding	-	-
FBgn0036044	785.149	635.224	450.397	135.923	171.993	130.017	623.59	145.978	2.09341	2.62373e-27	5.85173e-25	Zasp67	3L	9787933	9797687	-	3248	protein_coding	-	PDZ
FBgn0263406	359.564	239.073	195.236	34.9516	31.2715	45.8258	264.624	37.3496	2.82831	3.15369e-27	6.92713e-25	CR43452	3R	20678183	20679079	+	897	lincRNA	-	-
FBgn0033668	399.176	290.444	203.935	50.4856	29.3171	44.7601	297.852	41.5209	2.84306	7.41547e-27	1.60451e-24	CG13188	2R	11939557	11967435	+	4532	protein_coding	-	MH2
FBgn0014454	7305.03	5142.05	3285.19	273.787	142.676	156.66	5244.09	191.041	4.7784	8.4508e-27	1.80164e-24	Acp1	2L	7740562	7741537	-	858	protein_coding	-	-
FBgn0039777	3597.67	2904.44	2482.02	1240.78	1004.6	950.619	2994.71	1065.33	1.49067	1.06256e-26	2.13944e-24	Jon99Fii	3R	30487016	30487928	-	913	protein_coding	-	Trypsin
FBgn0005664	588.1	542.361	469.727	156.311	170.039	98.0459	533.396	141.465	1.91094	3.3846e-26	6.63061e-24	Cry	2L	11944129	11947131	+	2261	protein_coding	-	Chitin_bind_4
FBgn0039094	1781.57	1548.05	1577.36	830.1	792.538	781.17	1635.66	801.269	1.02916	5.52464e-26	1.06788e-23	CG10184	3R	23602507	23605495	-	1330	protein_coding	-	Beta_elim_lyase
FBgn0035926	2538.27	2155.61	2194.96	1187.38	1024.14	1056.13	2296.28	1089.22	1.07572	1.93856e-25	3.60298e-23	CG5804	3L	8788144	8788545	-	337	protein_coding	-	-
FBgn0033521	534.267	568.046	706.524	196.117	214.014	224.866	602.946	211.666	1.51145	2.03452e-25	3.73348e-23	CG12896	2R	10426880	10427915	-	848	protein_coding	-	-
FBgn0040601	273.228	224.255	128.547	22.3302	25.4081	23.4458	208.676	23.728	3.13562	2.90758e-25	5.26889e-23	CG13643	3R	24897685	24906004	-	3284	protein_coding	-	CBM_14
FBgn0035281	2490.54	2260.33	1268.07	127.185	82.0877	54.3516	2006.31	87.8747	4.51152	4.2344e-25	7.57853e-23	Cpr62Bc	3L	1840281	1842084	-	1134	protein_coding	-	Chitin_bind_4
FBgn0001285	930.396	780.446	674.629	310.681	231.605	219.538	795.157	253.941	1.64517	4.91276e-25	8.6854e-23	Jon44E	2R	8691448	8692844	+	1397	protein_coding	-	Trypsin
FBgn0042201	40642.9	29411	21240.2	4595.16	4583.23	4468.55	30431.3	4548.98	2.74193	8.86506e-25	1.52996e-22	Nplp3	3L	16318024	16318690	+	538	protein_coding	-	-
FBgn0030592	555.597	511.735	448.464	158.253	85.0194	69.2716	505.265	104.181	2.27404	3.95449e-24	6.58946e-22	CG9514	X	14885952	14896891	-	3099	protein_coding	-	-
FBgn0020906	3824.17	3245.27	2745.88	233.981	86.9739	106.572	3271.77	142.509	4.52035	1.81452e-23	2.95563e-21	Jon25Bi	2L	4954279	4955144	-	866	protein_coding	-	Trypsin
FBgn0013277	140.169	189.678	207.801	27.1846	29.3171	9.59145	179.216	22.031	3.01192	2.25624e-23	3.63431e-21	Hsp70Ba	3R	12465453	12467776	-	2324	protein_coding	-	HSP70
FBgn0034253	707.954	590.768	417.535	177.671	138.767	157.726	572.086	158.055	1.85524	3.22645e-23	5.1157e-21	CG10936	2R	17604951	17639138	-	5377	protein_coding	-	-
FBgn0036589	1022.83	1629.06	1008.08	417.477	359.622	363.409	1219.99	380.17	1.6819	3.2465e-23	5.1157e-21	CG13067	3L	16271282	16271918	+	564	protein_coding	-	-
FBgn0004783	173.687	207.46	103.417	15.534	20.5219	11.7229	161.522	15.9263	3.33548	3.39097e-23	5.22967e-21	Ccp84Aa	3R	6704084	6704903	+	765	protein_coding	-	Chitin_bind_4
FBgn0036024	12659.9	13891.9	8862	2069.91	1771.73	1200	11804.6	1680.54	2.81221	9.14582e-23	1.36688e-20	CG18180	3L	9641013	9641913	+	901	protein_coding	-	Trypsin
FBgn0085356	3541.8	2765.15	1410.15	199.03	175.902	146.003	2572.37	173.645	3.8885	5.79168e-22	8.07326e-20	CG34327	X	17222968	17223815	-	848	protein_coding	-	-
FBgn0260653	2446.86	2293.92	1541.59	800.974	809.151	691.65	2094.12	767.258	1.44808	7.49005e-22	1.03413e-19	serp	3L	19700977	19708015	-	2541	protein_coding	-	CBM_14
FBgn0038017	311.825	438.63	335.381	118.447	111.405	86.3231	361.946	105.392	1.77748	1.27734e-21	1.73062e-19	CG4115	3R	12360008	12363255	+	1115	protein_coding	-	-
FBgn0033728	25256.8	18338.5	12464.2	2722.34	2031.67	1998.22	18686.5	2250.74	3.05348	3.07135e-21	4.08489e-19	Cpr49Ae	2R	12402216	12405108	+	1186	protein_coding	-	Chitin_bind_4
FBgn0031959	355.501	358.61	300.587	106.796	128.995	116.163	338.232	117.318	1.5272	4.20041e-21	5.48588e-19	spz3	2L	7873495	7879552	-	2552	protein_coding	-	-
FBgn0033271	1066.5	1028.41	691.06	286.409	297.079	366.607	928.657	316.698	1.55283	5.19567e-21	6.66564e-19	CG8708	2R	8159406	8161565	-	1862	protein_coding	-	Fringe
FBgn0264831	504.811	381.332	404.971	158.253	88.9284	115.097	430.371	120.76	1.83237	6.74574e-21	8.50374e-19	CR44039	3R	12268784	12270223	+	1383	lincRNA	-	-
FBgn0058198	841.013	637.2	512.254	218.447	176.88	231.261	663.489	208.862	1.66795	8.34048e-21	1.04234e-18	CG40198	3R	4160610	4162235	-	1567	protein_coding	-	-
FBgn0262599	783.117	537.421	481.326	204.855	184.697	181.172	600.621	190.241	1.65766	1.12875e-20	1.39858e-18	CG43129	2L	10850141	10854604	+	2417	protein_coding	-	-
FBgn0053138	6419.33	5227.01	3946.29	1951.46	2243.73	1754.17	5197.54	1983.12	1.38984	1.18875e-20	1.46045e-18	AGBE	2R	13171401	13174796	+	2322	protein_coding	-	-
FBgn0038714	255.96	229.194	173.973	60.1944	49.839	39.4315	219.709	49.8216	2.13599	1.31709e-20	1.60453e-18	Cpr92A	3R	19597502	19598955	-	1120	protein_coding	-	Chitin_bind_4
FBgn0013275	74.1473	169.92	196.203	8.73789	12.7041	12.7886	146.757	11.4102	3.68926	1.6387e-20	1.97969e-18	Hsp70Aa	3R	11954163	11956544	-	2382	protein_coding	-	HSP70
FBgn0032536	506.842	576.937	528.685	246.603	243.332	224.866	537.488	238.267	1.17295	2.26366e-20	2.67989e-18	Ance-3	2L	13914725	13956188	+	3426	protein_coding	-	Peptidase_M2
FBgn0031653	8231.36	6216.89	5422.16	3088.36	2390.32	2337.12	6623.47	2605.26	1.34599	3.44287e-20	3.96122e-18	Jon25Biii	2L	4949941	4950767	-	827	protein_coding	-	Trypsin
FBgn0031942	45906.3	33267.7	20973.4	3251.47	2233.96	1699.82	33382.5	2395.08	3.8009	4.67829e-20	5.25746e-18	CG7203	2L	7752170	7753186	-	730	protein_coding	-	-
FBgn0032283	1917.67	1926.42	1708.8	988.353	853.126	707.636	1850.96	849.705	1.12237	4.77661e-20	5.32666e-18	CG7296	2L	10686124	10687066	-	943	protein_coding	-	-
FBgn0034030	241.74	206.472	119.848	33.9807	26.3853	30.9058	189.354	30.4239	2.63708	5.44833e-20	6.00634e-18	CG8192	2R	15544316	15549984	-	1755	protein_coding	-	CBM_14
FBgn0267243	147.279	194.618	191.37	44.6603	18.5675	30.9058	177.756	31.3779	2.50157	5.97604e-20	6.51389e-18	CR45683	2L	13437895	13442410	-	4516	lincRNA	-	TIR
FBgn0034391	723.19	621.393	384.674	38.8351	28.3398	12.7886	576.419	26.6545	4.42995	8.58095e-20	9.21466e-18	CG15080	2R	18783299	18794594	+	5546	protein_coding	-	-
FBgn0033597	615.524	474.195	296.721	9.70877	9.77235	1.06572	462.147	6.84895	6.06305	3.14371e-19	3.25531e-17	Cpr47Ea	2R	11251751	11253398	-	829	protein_coding	-	Chitin_bind_4
FBgn0032726	1808.99	1597.44	1291.27	753.401	698.723	708.702	1565.9	720.275	1.12005	3.70263e-19	3.80688e-17	CG10621	2L	18952206	18954431	-	1519	protein_coding	-	-
FBgn0036023	380.894	416.896	183.638	63.107	66.452	66.0744	327.143	65.2111	2.32643	4.07426e-19	4.13039e-17	CG18179	3L	9639271	9640140	+	870	protein_coding	-	Trypsin
FBgn0004028	28493.9	20826.1	18212.1	10030.1	10007.9	8403.18	22510.7	9480.39	1.24754	5.1901e-19	5.22506e-17	wupA	X	18105568	18116922	-	1978	protein_coding	-	-
FBgn0036600	100.556	125.464	78.2879	9.70877	11.7268	9.59145	101.436	10.3423	3.29161	5.27325e-19	5.27215e-17	CG13043	3L	16305225	16305870	-	646	protein_coding	-	-
FBgn0034709	3139.58	2928.15	2346.7	1401.95	1436.54	1231.97	2804.81	1356.82	1.04727	7.36204e-19	7.3101e-17	Swim	2R	22189817	22202671	-	2171	protein_coding	-	Peptidase_C1
FBgn0036549	1962.36	1681.42	1285.47	716.507	595.136	712.965	1643.08	674.869	1.28373	7.76201e-19	7.65482e-17	CG10516	3L	15968204	15969902	+	1329	protein_coding	-	SPRY
FBgn0033308	5709.34	4731.08	2429.82	187.379	89.9056	58.6144	4290.08	111.966	5.25909	8.91763e-19	8.67644e-17	CG8736	2R	8594031	8595001	-	764	protein_coding	-	-
FBgn0025643	225.489	311.19	234.864	0	0	0	257.181	0	10.4441	2.20025e-18	2.08477e-16	CG3588	X	2919770	2924426	+	3438	protein_coding	-	-
FBgn0039114	7567.09	5940.28	4842.25	2928.17	2538.86	2362.69	6116.54	2609.91	1.22854	2.84546e-18	2.66133e-16	Lsd-1	3R	23763857	23766662	+	1960	protein_coding	-	Perilipin
FBgn0031879	2081.2	1977.79	1366.66	766.993	811.105	695.913	1808.55	758.004	1.25408	3.67825e-18	3.3964e-16	uif	2L	6972828	7010359	-	11820	protein_coding	-	CUB
FBgn0040356	221.426	264.759	201.036	0	0	0	229.074	0	10.2769	7.40855e-18	6.75482e-16	CG12498	X	2809881	2810846	+	966	protein_coding	-	-
FBgn0039481	1596.71	1199.32	715.223	158.253	158.312	149.2	1170.42	155.255	2.91408	9.06228e-18	8.15999e-16	Cpr97Eb	3R	27089704	27091130	-	1054	protein_coding	-	Chitin_bind_4
FBgn0029639	200.096	294.396	183.638	0	0	0	226.043	0	10.2578	1.19603e-17	1.05084e-15	CG14419	X	2885186	2885914	-	729	protein_coding	-	-
FBgn0040959	361.595	304.275	308.319	126.214	76.2243	115.097	324.73	105.845	1.61801	1.2438e-17	1.08623e-15	Peritrophin-15a	2L	8395665	8396096	-	361	protein_coding	-	-
FBgn0051973	2016.2	1869.12	1280.64	706.799	770.061	640.496	1721.98	705.785	1.28626	1.32668e-17	1.14482e-15	Cda5	2L	25402	65404	-	10793	protein_coding	-	CBM_14
FBgn0035280	913.129	709.317	531.584	250.486	278.512	220.603	718.01	249.867	1.52162	1.40813e-17	1.20791e-15	Cpr62Bb	3L	1832636	1835164	-	992	protein_coding	-	Chitin_bind_4
FBgn0034974	372.768	309.215	202.969	74.7575	83.065	80.9945	294.984	79.6057	1.88924	1.89364e-17	1.59605e-15	CG16786	2R	24081782	24086287	+	3203	protein_coding	-	-
FBgn0023214	303.699	335.888	316.051	134.952	128.018	128.952	318.546	130.64	1.28576	1.9062e-17	1.59735e-15	edl	2R	18667527	18673536	-	1454	protein_coding	-	SAM_PNT
FBgn0039804	281.353	226.231	174.94	66.0196	58.6341	63.943	227.508	62.8656	1.85495	2.98374e-17	2.45768e-15	CG15544	3R	30827819	30842034	+	4209	protein_coding	-	-
FBgn0022770	399.176	310.203	175.906	71.8449	59.6113	65.0087	295.095	65.4883	2.17098	4.56951e-17	3.72159e-15	Peritrophin-A	X	20244647	20248203	+	1516	protein_coding	-	CBM_14
FBgn0000046	12785.8	11743.2	8924.82	5666.04	5806.73	5086.67	11151.3	5519.81	1.01443	9.90061e-17	7.88621e-15	Act87E	3R	13425983	13428375	+	1989	protein_coding	-	Actin
FBgn0033927	3015.66	5111.43	5397.03	1041.75	933.259	841.916	4508.04	938.976	2.26327	1.20564e-16	9.49902e-15	CR10102	2R	14360433	14361780	-	1348	pseudogene	-	-
FBgn0050042	9167.85	6926.21	5466.62	3301.95	3145.72	3116.16	7186.89	3187.94	1.17266	4.8601e-16	3.55843e-14	Cpr49Ab	2R	12378440	12379396	+	852	protein_coding	-	Chitin_bind_4
FBgn0001224	5012.56	10806.7	13419.1	1000.97	1028.05	985.788	9746.13	1004.94	3.27772	6.40243e-16	4.6408e-14	Hsp23	3L	9381882	9382765	+	884	protein_coding	-	-
FBgn0000277	1319.42	1688.33	1145.32	583.497	569.728	703.373	1384.36	618.866	1.16209	7.05664e-16	5.03942e-14	CecA2	3R	30212156	30212568	+	355	protein_coding	-	-
FBgn0014869	12744.2	9244.83	7858.75	4687.39	4624.28	4096.62	9949.26	4469.43	1.1544	7.2415e-16	5.14608e-14	Pglym78	3R	29148248	29149901	+	1136	protein_coding	-	-
FBgn0027600	490.591	441.594	298.654	134.952	157.335	136.412	410.28	142.9	1.5206	7.43536e-16	5.23254e-14	obst-B	2L	10032690	10038954	+	1149	protein_coding	-	CBM_14
FBgn0031940	11287.7	7201.84	5576.8	1019.42	798.401	489.164	8022.1	768.995	3.38275	7.53719e-16	5.25519e-14	CG7214	2L	7743682	7744839	-	1041	protein_coding	-	-
FBgn0004169	44614.3	34268.5	28276.4	17019.5	17483.7	13876.7	35719.7	16126.6	1.14724	8.1264e-16	5.60757e-14	up	X	13593474	13602578	-	2530	protein_coding	-	-
FBgn0262854	351.438	225.243	247.428	97.0877	51.7935	46.8915	274.703	65.2576	2.06942	8.16167e-16	5.60757e-14	CG43218	3L	21258020	21258758	+	682	protein_coding	-	CBM_14
FBgn0038973	4805.35	5140.08	3462.06	2000.01	2232.98	1547.42	4469.16	1926.8	1.21349	9.93175e-16	6.75965e-14	Pebp1	3R	22466034	22466679	+	646	protein_coding	-	-
FBgn0038405	305.731	358.61	217.466	83.4954	107.496	82.0602	293.936	91.0172	1.68971	1.05574e-15	7.15189e-14	CG8927	3R	16181020	16186235	+	1454	protein_coding	-	-
FBgn0051104	1093.93	926.656	700.725	433.011	317.601	301.598	907.102	350.737	1.36975	1.68772e-15	1.12751e-13	CG31104	3R	25285473	25286974	+	1382	protein_coding	-	-
FBgn0039316	168.609	190.666	206.835	33.9807	69.3837	44.7601	188.703	49.3748	1.93345	2.52943e-15	1.65176e-13	CG11893	3R	25289889	25291366	+	1415	protein_coding	-	-
FBgn0035089	1441.3	1346.52	1458.47	839.809	635.203	569.093	1415.43	681.368	1.05388	2.85346e-15	1.85501e-13	Phk-3	2R	24970843	24973207	-	878	protein_coding	-	-
FBgn0036587	576.927	426.775	279.323	128.156	121.177	137.477	427.675	128.937	1.72983	3.12477e-15	2.02231e-13	CG4950	3L	16265797	16268156	-	2360	protein_coding	-	-
FBgn0003137	7265.42	6596.25	4396.69	2853.41	2683.49	2845.46	6086.12	2794.12	1.12309	1.08789e-14	6.68269e-13	Ppn	3R	28520665	28540324	-	9544	protein_coding	-	Kunitz_BPTI
FBgn0035546	128.996	114.597	39.6272	5.82526	8.79512	3.19715	94.4068	5.93918	3.9777	1.09956e-14	6.72586e-13	CG11345	3L	4457177	4458163	-	923	protein_coding	-	-
FBgn0039728	398.161	261.795	169.14	66.0196	70.3609	66.0744	276.365	67.485	2.03291	1.11656e-14	6.80118e-13	CG7896	3R	29983426	29990785	+	4955	protein_coding	-	-
FBgn0036590	107.666	57.2986	63.7901	2.91263	2.93171	0	76.2515	1.94811	5.25295	1.21026e-14	7.34105e-13	CG13065	3L	16277435	16278180	+	677	protein_coding	-	-
FBgn0052774	107.666	67.1776	83.1205	1.94175	1.95447	0	85.988	1.29874	6.00927	1.45588e-14	8.78432e-13	Muc4B	X	4244095	4246139	-	1987	protein_coding	-	-
FBgn0261509	374.799	394.175	295.754	161.166	146.585	136.412	354.909	148.054	1.25979	1.46032e-14	8.78432e-13	haf	2L	1555129	1608404	+	6069	protein_coding	-	-
FBgn0038819	8123.7	5536.23	3383.78	168.933	54.7252	33.0372	5681.23	85.565	6.05228	1.67391e-14	1.00276e-12	Cpr92F	3R	20669571	20672821	+	1858	protein_coding	-	Chitin_bind_4
FBgn0033518	584.037	1199.32	859.234	349.516	284.375	274.955	880.863	302.949	1.53954	2.42752e-14	1.42477e-12	Prx2540-2	2R	10418718	10419761	+	856	protein_coding	-	-
FBgn0024491	386.988	582.865	510.321	206.797	201.31	222.735	493.391	210.281	1.23139	2.99554e-14	1.73705e-12	Bin1	3R	16186156	16189564	-	3336	protein_coding	-	-
FBgn0003721	27382.7	20524.7	16898.6	10731.1	10759.4	9038.34	21602	10176.3	1.08591	3.72407e-14	2.10198e-12	Tm1	3R	15281371	15308779	+	9463	protein_coding	-	-
FBgn0034784	66.0215	84.9599	93.7522	9.70877	13.6813	13.8543	81.5779	12.4148	2.72046	4.08002e-14	2.28371e-12	CG9826	2R	22840739	22842977	+	2096	protein_coding	-	MFS_1
FBgn0029990	30024.6	29868.4	18539.7	12904.9	11777.6	11680.3	26144.2	12120.9	1.10897	4.48898e-14	2.50295e-12	CG2233	X	8035741	8037517	-	1480	protein_coding	-	-
FBgn0030880	772.96	346.755	245.495	0.970877	4.88618	0	455.07	1.95235	7.84526	6.5179e-14	3.6203e-12	CG6788	X	17888177	17889404	+	1150	protein_coding	-	Fibrinogen_C
FBgn0033926	17396.2	32314.4	37333.7	6221.38	5508.67	4582.58	29014.7	5437.55	2.41574	7.62139e-14	4.18512e-12	Arc1	2R	14357927	14360297	-	2371	protein_coding	-	-
FBgn0004780	95.4773	73.1051	84.087	9.70877	12.7041	19.1829	84.2231	13.8652	2.61274	9.10147e-14	4.94172e-12	Ccp84Ad	3R	6692732	6693527	+	735	protein_coding	-	Chitin_bind_4
FBgn0038511	102.587	130.404	72.4888	11.6505	15.6358	23.4458	101.827	16.9107	2.5987	9.30954e-14	5.03584e-12	CG5873	3R	17425768	17446499	+	3081	protein_coding	-	An_peroxidase
FBgn0030562	257.992	229.194	139.178	61.1653	62.543	41.563	208.788	55.0904	1.91785	9.37745e-14	5.05371e-12	CG9400	X	14288084	14289393	-	1156	protein_coding	-	SCP
FBgn0040717	102.587	96.8148	78.2879	21.3593	18.5675	12.7886	92.5633	17.5718	2.38955	9.80348e-14	5.24432e-12	Nplp4	2L	2008414	2009072	+	528	protein_coding	-	-
FBgn0031692	2124.88	1607.32	1163.69	740.779	685.042	604.261	1631.96	676.694	1.26949	1.22974e-13	6.50641e-12	TpnC25D	2L	5216701	5219053	+	1250	protein_coding	-	-
FBgn0034480	571.848	737.966	745.185	349.516	245.286	330.372	685	308.391	1.15207	1.40862e-13	7.42409e-12	CG16898	2R	20003620	20005003	-	1325	protein_coding	-	-
FBgn0004117	22710.4	17999.7	13398.8	8664.11	8890.88	6807.8	18036.3	8120.93	1.15112	1.41343e-13	7.42409e-12	Tm2	3R	15310193	15315197	+	2613	protein_coding	-	-
FBgn0037684	513.952	643.127	319.917	162.136	174.925	172.646	492.332	169.903	1.53478	1.50841e-13	7.89437e-12	CG8129	3R	9365398	9367763	+	1727	protein_coding	-	PALP
FBgn0034903	732.331	615.466	525.785	305.826	302.943	306.926	624.527	305.232	1.03243	1.66407e-13	8.67771e-12	CG9850	2R	23753477	23798395	-	5550	protein_coding	-	-
FBgn0035490	1134.55	864.418	593.441	350.487	343.009	316.518	864.138	336.671	1.35925	1.6949e-13	8.8068e-12	CG1136	3L	4046596	4059660	+	2704	protein_coding	-	-
FBgn0035544	3420.93	3220.57	2606.7	1399.03	1847.95	1268.2	3082.73	1505.06	1.03402	1.83652e-13	9.47477e-12	CG15021	3L	4436721	4438311	+	1536	protein_coding	-	-
FBgn0035553	279.322	211.412	110.183	50.4856	43.9756	26.6429	200.306	40.368	2.30559	3.21293e-13	1.62292e-11	CG13722	3L	4485159	4490963	-	2603	protein_coding	-	-
FBgn0037487	151.342	141.271	99.5513	33.0098	39.0894	29.8401	130.721	33.9798	1.94053	3.90076e-13	1.94997e-11	CG14608	3R	7224414	7241138	+	4222	protein_coding	-	CBM_14
FBgn0267692	78.2101	86.9357	90.8526	22.3302	6.84065	10.6572	85.3328	13.276	2.67866	5.39829e-13	2.68011e-11	CR46028	3R	15922929	15924187	-	1259	lincRNA	-	-
FBgn0010423	2416.39	1931.36	1283.53	461.167	414.348	307.992	1877.09	394.502	2.24999	5.73391e-13	2.82737e-11	TpnC47D	2R	11273845	11275286	-	791	protein_coding	-	-
FBgn0022702	513.952	418.872	356.645	198.059	199.356	152.397	429.823	183.271	1.22747	6.40726e-13	3.13804e-11	Cht2	3L	1752328	1755934	-	3038	protein_coding	-	-
FBgn0036782	35.5501	88.9116	115.982	7.76702	6.84065	6.3943	80.1479	7.00065	3.51612	1.01358e-12	4.78628e-11	CG7320	3L	18201494	18203637	+	2023	protein_coding	-	-
FBgn0265883	246.819	224.255	173.007	47.573	57.6569	91.6516	214.693	65.6272	1.7151	1.10138e-12	5.18399e-11	CR44672	3L	18475298	18475679	+	382	lincRNA	-	-
FBgn0000667	11278.5	9430.55	7072.97	4748.56	4971.19	3926.1	9260.68	4548.62	1.02556	1.29271e-12	5.98738e-11	Actn	X	2023822	2042311	-	5272	protein_coding	-	CH
FBgn0051148	649.043	532.481	501.622	280.584	305.875	246.181	561.049	277.546	1.01388	1.38768e-12	6.40369e-11	CG31148	3R	23700621	23702605	+	1777	protein_coding	-	Glyco_hydro_30
FBgn0036656	1510.37	1237.85	906.593	567.963	573.637	571.224	1218.27	570.941	1.09314	1.39144e-12	6.40369e-11	CG13026	3L	16724678	16726169	-	1431	protein_coding	-	-
FBgn0040355	72.1158	74.093	69.5892	0	0	0	71.9327	0	8.60586	1.41286e-12	6.48173e-11	CG3526	X	2890768	2894232	+	1200	protein_coding	-	ZZ
FBgn0031031	75.163	43.4679	59.9241	1.94175	0.977235	2.13143	59.5183	1.68347	5.15249	1.94631e-12	8.87285e-11	CG14218	X	19580350	19581981	-	1571	protein_coding	-	-
FBgn0001230	3568.21	6478.69	6722.13	1381.56	1469.76	1364.12	5589.68	1405.15	1.99205	3.09241e-12	1.37941e-10	Hsp68	3R	24055080	24057310	-	2231	protein_coding	-	HSP70
FBgn0002564	1213.78	693.51	596.341	144.661	118.245	71.403	834.544	111.436	2.90356	3.39604e-12	1.50558e-10	Lsp1gamma	3L	66430	68995	+	2501	protein_coding	-	-
FBgn0033830	84.3044	99.7785	71.5223	23.3011	12.7041	11.7229	85.2017	15.9093	2.41381	3.56009e-12	1.57349e-10	CG10814	2R	13375975	13377731	-	1458	protein_coding	-	-
FBgn0039685	6083.12	4766.65	2905.35	744.663	409.461	343.161	4585.04	499.095	3.19934	3.86474e-12	1.69266e-10	Obp99b	3R	29716254	29716896	-	594	protein_coding	-	-
FBgn0265727	74.1473	97.8027	39.6272	0	0	0	70.5257	0	8.57677	4.17773e-12	1.81596e-10	CR44534	X	9314685	9315171	+	487	lincRNA	-	-
FBgn0034497	21413.3	15589.2	13102.1	8338.86	9073.63	7457.89	16701.5	8290.13	1.01046	4.18384e-12	1.81596e-10	CG9090	2R	20279066	20281127	-	1499	protein_coding	-	Mito_carr
FBgn0035667	701.86	437.642	566.379	281.554	171.016	139.609	568.627	197.393	1.52439	7.08685e-12	3.02171e-10	Jon65Ai	3L	6053493	6054443	-	951	protein_coding	-	Trypsin
FBgn0004782	607.398	636.212	323.783	77.6702	54.7252	104.44	522.464	78.9452	2.72775	9.1456e-12	3.80215e-10	Ccp84Ab	3R	6701968	6702877	-	834	protein_coding	-	Chitin_bind_4
FBgn0037420	56.8801	81.9962	83.1205	11.6505	14.6585	13.8543	73.9989	13.3878	2.46862	9.15328e-12	3.80215e-10	CG15597	3R	6284462	6285200	-	679	protein_coding	-	-
FBgn0030189	356.516	476.171	453.297	214.564	218.901	206.749	428.661	213.405	1.00633	1.36318e-11	5.59416e-10	CG2909	X	10326464	10328946	+	2018	protein_coding	-	-
FBgn0010424	1216.83	984.942	836.037	571.847	495.458	410.301	1012.6	492.535	1.03862	1.36603e-11	5.59416e-10	TpnC73F	3L	17046063	17048390	+	1059	protein_coding	-	-
FBgn0039805	2370.68	1690.31	1112.46	323.302	223.787	154.529	1724.48	233.873	2.88183	1.45622e-11	5.92999e-10	Cpr100A	3R	30867521	30869184	+	1378	protein_coding	-	Chitin_bind_4
FBgn0261955	32286.6	25003.9	19172.8	13486.5	13444.8	11265.7	25487.8	12732.3	1.00127	1.54293e-11	6.24802e-10	kdn	X	6350629	6361323	+	2836	protein_coding	-	Citrate_synt
FBgn0053666	37.5815	70.1413	57.0245	7.76702	2.93171	1.06572	54.9158	3.92148	3.78457	2.08557e-11	8.35207e-10	CG33666	X	6476243	6476967	-	666	protein_coding	-	-
FBgn0041183	174.703	331.936	162.375	63.107	70.3609	61.8116	223.005	65.0932	1.77595	2.26551e-11	9.02283e-10	Tep1	2L	15888640	15893811	-	4219	protein_coding	-	A2M_comp
FBgn0004554	167.593	256.856	214.567	93.2042	74.2699	65.0087	213.005	77.4943	1.4567	2.31322e-11	9.18761e-10	Edg91	3R	17610856	17611511	-	604	protein_coding	-	-
FBgn0005633	200.096	125.464	103.417	45.6312	34.2032	28.7744	142.992	36.2029	1.97714	2.32503e-11	9.20927e-10	fln	3L	19989551	19991220	-	1300	protein_coding	-	-
FBgn0250833	51.8015	64.2139	47.3593	7.76702	5.86341	6.3943	54.4583	6.67491	3.0266	2.87593e-11	1.1118e-09	CG34461	3L	8325859	8328307	+	1873	protein_coding	-	Chitin_bind_4
FBgn0033731	240.725	150.162	86.02	0	0	2.13143	158.969	0.710478	7.8796	3.53925e-11	1.36097e-09	Cpr49Ah	2R	12413962	12415170	+	990	protein_coding	-	Chitin_bind_4
FBgn0031001	109.697	57.2986	112.116	23.3011	16.613	13.8543	93.0373	17.9228	2.37095	3.9887e-11	1.5177e-09	CG7884	X	19220622	19235910	+	3960	protein_coding	-	-
FBgn0033355	84.3044	108.67	43.4933	8.73789	15.6358	8.52573	78.8225	10.9665	2.84021	4.02278e-11	1.52665e-09	CG13748	2R	8940415	8941136	+	722	protein_coding	-	Kunitz_BPTI
FBgn0033869	76.1787	65.2018	40.5937	9.70877	7.81788	5.32858	60.6581	7.61841	2.9834	4.43857e-11	1.67568e-09	Cpr50Cb	2R	13794777	13805231	+	867	protein_coding	-	Chitin_bind_4
FBgn0028939	86.3359	95.8269	50.2589	17.4758	12.7041	6.3943	77.4739	12.1914	2.65575	5.15329e-11	1.93542e-09	NimC2	2L	13980126	13983269	+	2819	protein_coding	-	-
FBgn0030326	442.852	446.534	228.098	57.2818	28.3398	21.3143	372.495	35.6453	3.38275	5.43516e-11	2.03159e-09	CG2444	X	11704310	11705300	-	913	protein_coding	-	-
FBgn0039475	556.612	409.981	379.841	229.127	170.039	120.426	448.812	173.197	1.37093	5.43739e-11	2.03159e-09	CG6277	3R	27022071	27023217	-	1085	protein_coding	-	Lipase
FBgn0034943	449.962	382.32	343.114	221.36	158.312	163.055	391.799	180.909	1.11321	5.61136e-11	2.0912e-09	Fmo-1	2R	23962956	23964641	+	1454	protein_coding	-	FMO-like
FBgn0035398	1354.97	1075.83	627.27	241.748	231.605	196.092	1019.35	223.148	2.19118	5.99651e-11	2.22331e-09	Cht7	3L	3090985	3106958	-	3953	protein_coding	-	CBM_14
FBgn0050091	205.175	252.904	182.672	81.5537	99.678	76.7316	213.583	85.9878	1.31086	6.27314e-11	2.30817e-09	CG30091	2R	15680545	15682477	+	1681	protein_coding	-	Trypsin
FBgn0264383	37.5815	65.2018	54.125	1.94175	0	2.13143	52.3028	1.35773	5.28818	6.69498e-11	2.45714e-09	CR43835	X	7500443	7501383	+	759	lincRNA	-	-
FBgn0037151	242.756	357.622	378.875	144.661	148.54	110.835	326.418	134.678	1.2759	6.73339e-11	2.45879e-09	CG7130	3L	22075056	22075756	-	701	protein_coding	-	DnaJ
FBgn0031926	250.882	206.472	144.978	84.4663	59.6113	57.5487	200.777	67.2088	1.5759	7.84951e-11	2.82368e-09	CG6739	2L	7608389	7616533	+	2718	protein_coding	-	Fz
FBgn0030108	27.4243	85.9478	100.518	8.73789	6.84065	4.26287	71.2967	6.6138	3.42276	8.04839e-11	2.88093e-09	Gr8a	X	9227137	9228827	+	1509	protein_coding	-	-
FBgn0042206	119.855	106.694	144.978	39.806	31.2715	46.8915	123.842	39.323	1.65915	1.05871e-10	3.73434e-09	GstD10	3R	12364776	12365735	-	876	protein_coding	-	GST_C
FBgn0035510	56.8801	72.1172	27.0625	4.85439	1.95447	3.19715	52.0199	3.33534	3.95995	1.12035e-10	3.94216e-09	Cpr64Aa	3L	4207838	4209178	-	1014	protein_coding	-	Chitin_bind_4
FBgn0004654	7111.03	6231.71	3889.26	2931.08	2758.73	2680.28	5744	2790.03	1.04168	1.16902e-10	4.0837e-09	Pgd	X	2145136	2148566	+	1895	protein_coding	-	NAD_binding_2
FBgn0003358	4484.39	2965.69	2528.41	1067.96	772.993	900.531	3326.16	913.829	1.86381	1.20459e-10	4.18776e-09	Jon99Ci	3R	29925226	29926189	-	907	protein_coding	-	Trypsin
FBgn0040843	306.746	248.952	181.705	105.826	85.0194	95.9145	245.801	95.5865	1.36172	1.44251e-10	4.96723e-09	CG15213	3L	5132796	5133220	-	366	protein_coding	-	-
FBgn0035040	259.008	242.037	262.893	141.748	98.7007	102.309	254.646	114.253	1.15455	1.58982e-10	5.41321e-09	CG4741	2R	24610801	24615158	-	1691	protein_coding	-	-
FBgn0050045	90.3987	69.1534	52.1919	18.4467	4.88618	5.32858	70.5814	9.55381	2.8727	1.92049e-10	6.4597e-09	Cpr49Aa	2R	12376626	12377378	+	584	protein_coding	-	Chitin_bind_4
FBgn0053669	111.729	87.9237	115.016	32.0389	29.3171	35.1687	104.889	32.1749	1.70683	1.97176e-10	6.61679e-09	CG33669	X	6399455	6400100	-	587	protein_coding	-	-
FBgn0051041	106.65	124.476	119.848	37.8642	39.0894	13.8543	116.991	30.2693	1.941	2.0076e-10	6.72153e-09	CG31041	3R	29590070	29590906	-	700	protein_coding	-	-
FBgn0029147	891.799	830.829	572.178	372.817	356.691	414.564	764.935	381.357	1.00436	2.10136e-10	7.01921e-09	NtR	2R	22127808	22130184	+	1876	protein_coding	-	Neur_chan_LBD
FBgn0002562	389.019	352.683	213.6	28.1554	11.7268	4.26287	318.434	14.715	4.42981	2.47175e-10	8.23745e-09	Lsp1alpha	X	12490291	12492982	+	2625	protein_coding	-	-
FBgn0000047	37506.3	31341.3	18008.1	7467.02	5160.78	4360.91	28951.9	5662.9	2.35402	2.49391e-10	8.29225e-09	Act88F	3R	15439969	15442177	+	1595	protein_coding	-	Actin
FBgn0065047	50.7858	109.658	131.446	19.4175	16.613	21.3143	97.2966	19.115	2.35105	2.8397e-10	9.29282e-09	snoRNA:U3:54Ab	2R	17145654	17145826	+	173	snoRNA	-	-
FBgn0000299	10538.1	9249.77	5905.42	4678.66	4119.05	4023.08	8564.41	4273.59	1.00283	2.85619e-10	9.32572e-09	Cg25C	2L	5029609	5037279	+	6165	protein_coding	-	Collagen
FBgn0039161	250.882	188.69	164.308	80.5828	48.8618	85.2573	201.293	71.5673	1.49357	4.27457e-10	1.38632e-08	CG13606	3R	24172628	24184144	+	1441	protein_coding	-	-
FBgn0024897	195.017	191.654	206.835	88.3498	86.9739	98.0459	197.835	91.1232	1.11995	4.55084e-10	1.45959e-08	b6	X	1686624	1690187	+	2139	protein_coding	-	-
FBgn0265045	23446.8	18850.2	12373.4	5884.49	6173.19	4915.09	18223.5	5657.59	1.68751	5.51386e-10	1.74911e-08	Strn-Mlck	2R	15946933	15989498	-	32768	protein_coding	-	Pkinase
FBgn0000045	45078.5	35492.5	26186.8	11872.9	12810.6	8781.51	35585.9	11155	1.6736	6.92452e-10	2.16346e-08	Act79B	3L	21985210	21987190	+	1619	protein_coding	-	Actin
FBgn0260011	50.7858	68.1655	22.2299	2.91263	2.93171	1.06572	47.0604	2.30335	4.33425	7.2404e-10	2.25524e-08	NimC4	2L	14047582	14048863	+	1282	protein_coding	-	-
FBgn0052865	29.4558	46.4316	52.1919	4.85439	1.95447	2.13143	42.6931	2.9801	3.83124	7.62485e-10	2.36697e-08	alphagamma-element:CR32865	3R	12475336	12478267	-	1357	lincRNA	-	-
FBgn0039443	50.7858	25.6856	39.6272	0	0	0	38.6995	0	7.71094	8.55812e-10	2.62298e-08	TwdlS	3R	26636688	26637557	+	810	protein_coding	-	-
FBgn0029573	59.9273	50.3832	36.7276	6.79614	4.88618	7.46002	49.0127	6.38078	2.94476	8.77887e-10	2.68496e-08	CG14770	X	1369249	1370176	+	690	protein_coding	-	-
FBgn0047000	441.837	364.537	269.658	175.729	133.881	167.318	358.677	158.976	1.17366	9.18174e-10	2.79638e-08	CG33946	3L	6220578	6220949	+	310	protein_coding	-	-
FBgn0030073	248.85	211.412	181.705	107.767	87.9512	63.943	213.989	86.5538	1.30161	1.44164e-09	4.32701e-08	CG10962	X	8972908	8974255	-	1074	protein_coding	-	adh_short
FBgn0039778	681.546	449.497	346.98	195.146	234.536	138.543	492.674	189.409	1.37712	1.48377e-09	4.44425e-08	Jon99Fi	3R	30488963	30489895	+	933	protein_coding	-	Trypsin
FBgn0038820	24010.5	15464.7	11825.3	4791.28	4863.7	4014.56	17100.2	4556.51	1.90799	1.64581e-09	4.85933e-08	CG4000	3R	20676224	20677351	-	999	protein_coding	-	-
FBgn0034182	554.581	379.356	272.558	181.554	164.175	133.215	402.165	159.648	1.33103	2.03859e-09	5.9642e-08	CG9640	2R	17044743	17046768	+	1866	protein_coding	-	-
FBgn0267678	56.8801	48.4074	48.3259	10.6796	3.90894	9.59145	51.2045	8.06001	2.67135	2.04059e-09	5.9642e-08	CR46014	3R	12276604	12276932	+	329	lincRNA	-	-
FBgn0033307	70.0844	130.404	100.518	29.1263	31.2715	26.6429	100.335	29.0136	1.78927	4.24194e-09	1.19177e-07	CG14752	2R	8590497	8591948	+	540	protein_coding	-	-
FBgn0051259	133.059	140.283	125.647	61.1653	48.8618	51.1544	132.996	53.7271	1.30642	4.30819e-09	1.20804e-07	CG31259	3R	8523944	8526667	+	2464	protein_coding	-	-
FBgn0263039	70.0844	68.1655	101.484	17.4758	27.3626	15.9858	79.9114	20.2747	1.97548	4.79949e-09	1.32933e-07	CR43334	3L	628435	643900	+	15466	lincRNA	-	-
FBgn0036665	247.835	207.46	152.71	83.4954	92.8373	54.3516	202.668	76.8948	1.39379	5.05084e-09	1.39205e-07	CG13024	3L	16809658	16829074	-	2013	protein_coding	-	-
FBgn0035427	157.436	133.367	116.949	65.0488	42.0211	36.2344	135.917	47.7681	1.50368	5.42454e-09	1.48939e-07	ckd	3L	3257878	3268184	+	1747	protein_coding	-	CBM_14
FBgn0013279	319.951	616.453	563.479	68.9323	127.041	59.6801	499.961	85.2177	2.55169	5.78141e-09	1.57248e-07	Hsp70Bc	3R	12509076	12511461	+	2386	protein_coding	-	HSP70
FBgn0002773	124531	88012.6	67607.9	33759.3	31142.5	26072.8	93383.8	30324.9	1.62266	5.80755e-09	1.57663e-07	Mlc2	3R	30171438	30174551	-	2286	protein_coding	-	-
FBgn0013276	105.634	204.497	348.913	14.5632	29.3171	14.92	219.681	19.6001	3.48506	7.07991e-09	1.90776e-07	Hsp70Ab	3R	11958535	11960909	+	2375	protein_coding	-	HSP70
FBgn0033520	160.483	219.315	303.486	80.5828	106.519	59.6801	227.762	82.2605	1.46724	7.92722e-09	2.11641e-07	Prx2540-1	2R	10424436	10425471	+	848	protein_coding	-	-
FBgn0051813	14.22	50.3832	32.8616	0	0	0	32.4883	0	7.46025	8.40614e-09	2.23603e-07	CG31813	2L	13736138	13737030	+	893	protein_coding	-	-
FBgn0066365	40.6286	61.2502	57.991	7.76702	12.7041	9.59145	53.29	10.0208	2.41111	9.05935e-09	2.38788e-07	dyl	3L	4294004	4307718	-	3139	protein_coding	-	Zona_pellucida
FBgn0001225	4025.28	7741.23	9610.08	1658.26	1691.59	1775.48	7125.53	1708.45	2.06034	1.04197e-08	2.70706e-07	Hsp26	3L	9376418	9377427	-	1010	protein_coding	-	-
FBgn0052553	62.9744	95.8269	64.7566	21.3593	17.5902	20.2486	74.5193	19.7327	1.9176	1.05469e-08	2.73522e-07	CG32553	X	18124575	18127027	-	1066	protein_coding	-	-
FBgn0039073	206.19	199.557	127.58	75.7284	76.2243	59.6801	177.776	70.5443	1.33045	1.08889e-08	2.81385e-07	CG4408	3R	23361889	23363574	-	1686	protein_coding	-	-
FBgn0036467	266.118	282.541	455.23	158.253	151.471	138.543	334.629	149.423	1.16317	1.1558e-08	2.96406e-07	CG12310	3L	15050263	15050806	-	544	protein_coding	-	-
FBgn0033667	158.452	92.8632	63.7901	25.2428	27.3626	28.7744	105.035	27.1266	1.95268	1.34752e-08	3.40331e-07	CG13183	2R	11904323	11912779	-	2211	protein_coding	-	MH2
FBgn0002772	33195.6	24147.4	18592.9	9643.72	9715.67	7772.27	25312	9043.89	1.48478	1.61011e-08	4.01751e-07	Mlc1	3R	27657078	27660177	-	1414	protein_coding	-	-
FBgn0002565	526.141	338.852	216.5	49.5147	22.4764	11.7229	360.498	27.9047	3.68839	2.21387e-08	5.43974e-07	Lsp2	3L	12129393	12131869	+	2477	protein_coding	-	-
FBgn0050377	187.907	221.291	162.375	103.884	74.2699	57.5487	190.524	78.5675	1.27401	2.54659e-08	6.19428e-07	CG30377	2R	7890025	7915032	+	4078	protein_coding	-	-
FBgn0035887	63.9901	72.1172	67.6562	3.88351	23.4536	3.19715	67.9212	10.1781	2.72646	3.10555e-08	7.50352e-07	Jon66Cii	3L	8392820	8393649	-	830	protein_coding	-	Trypsin
FBgn0038977	217.363	137.319	155.609	76.6993	64.4975	73.5345	170.097	71.5771	1.24828	3.56212e-08	8.52108e-07	CG5376	3R	22488033	22488955	-	812	protein_coding	-	-
FBgn0036601	36.5658	31.613	28.029	0.970877	1.95447	3.19715	32.0693	2.04083	3.9938	3.60058e-08	8.57105e-07	CG13063	3L	16306600	16307205	+	544	protein_coding	-	-
FBgn0001128	24636.2	16736.1	12713.6	6476.72	6066.67	5924.32	18028.6	6155.91	1.55023	4.19926e-08	9.83467e-07	Gpdh	2L	5943643	5948968	+	3152	protein_coding	-	NAD_Gly3P_dh_N
FBgn0033866	26.4086	35.5646	52.1919	4.85439	2.93171	5.32858	38.0551	4.37156	3.12937	4.56836e-08	1.05964e-06	CG6280	2R	13753964	13758971	+	3706	protein_coding	-	-
FBgn0266116	31.4872	38.5283	40.5937	5.82526	1.95447	6.3943	36.8698	4.72468	2.97437	6.28531e-08	1.42819e-06	CR44842	3L	1460703	1462801	-	1983	lincRNA	-	-
FBgn0044810	1242.22	557.179	362.444	99.0295	99.678	66.0744	720.615	88.2606	3.02875	6.41534e-08	1.45091e-06	TotX	3R	20904917	20905518	-	602	protein_coding	-	-
FBgn0038082	45.7072	44.4558	49.2924	8.73789	10.7496	9.59145	46.4851	9.69298	2.26189	6.74709e-08	1.52006e-06	CG5724	3R	12739642	12741417	+	1710	protein_coding	-	UDPGT
FBgn0030105	59.9273	31.613	28.029	3.88351	1.95447	7.46002	39.8564	4.43267	3.18564	7.10976e-08	1.59305e-06	CG15369	X	9216872	9217466	+	542	protein_coding	-	-
FBgn0038083	101.572	134.355	66.6897	33.0098	26.3853	35.1687	100.872	31.5213	1.67937	7.14869e-08	1.5993e-06	CG5999	3R	12741958	12743680	-	1667	protein_coding	-	UDPGT
FBgn0015035	180.797	177.823	157.542	90.2916	76.2243	86.3231	172.054	84.2797	1.02954	7.82312e-08	1.7448e-06	Cyp4e3	2L	9747839	9750071	-	1805	protein_coding	-	p450
FBgn0035859	31.4872	38.5283	32.8616	6.79614	0	2.13143	34.2924	2.97586	3.51528	8.9409e-08	1.98298e-06	CG13678	3L	8222141	8222953	+	561	protein_coding	-	-
FBgn0040359	42.6601	48.4074	28.029	4.85439	8.79512	3.19715	39.6988	5.61555	2.80973	1.14281e-07	2.47273e-06	CG11380	X	1191308	1196660	+	2801	protein_coding	-	-
FBgn0034563	280.338	196.593	212.634	126.214	104.564	66.0744	229.855	98.9509	1.21179	1.16081e-07	2.50421e-06	CG15649	2R	20972916	20974017	-	766	protein_coding	-	-
FBgn0004507	35006.7	27901.4	19975	11162.2	12202.7	9210.99	27627.7	10858.6	1.34725	1.24022e-07	2.66757e-06	GlyP	2L	2130813	2137296	+	3144	protein_coding	-	-
FBgn0085235	46.7229	36.5525	17.3973	4.85439	0.977235	1.06572	33.5576	2.29911	3.84724	1.69715e-07	3.57611e-06	CG34206	2R	22163738	22164594	-	857	protein_coding	-	-
FBgn0038645	24.3772	35.5646	40.5937	4.85439	3.90894	3.19715	33.5118	3.98683	3.06642	1.71338e-07	3.60506e-06	CG7714	3R	18725399	18726434	-	953	protein_coding	-	-
FBgn0052642	42.6601	51.3711	16.4308	0.970877	0	0	36.8207	0.323626	6.67691	1.7935e-07	3.75187e-06	CG32642	X	12959220	12960790	+	1413	protein_coding	-	-
FBgn0052499	472.308	398.126	203.935	81.5537	76.2243	39.4315	358.123	65.7365	2.44389	1.8469e-07	3.84692e-06	Cda4	X	22583634	22632710	-	1934	protein_coding	-	CBM_14
FBgn0040102	213.3	165.968	164.308	86.4081	88.9284	93.7831	181.192	89.7065	1.01423	2.02472e-07	4.18722e-06	lectin-24Db	2L	4188123	4189284	+	1162	protein_coding	-	Lectin_C
FBgn0037125	57.8958	40.5042	23.1964	2.91263	4.88618	8.52573	40.5321	5.44151	2.91046	2.24078e-07	4.6143e-06	CG14573	3L	21734099	21734788	+	690	protein_coding	-	-
FBgn0265993	48.7544	51.3711	35.7611	11.6505	9.77235	6.3943	45.2955	9.27239	2.27957	2.26257e-07	4.65255e-06	CR44768	2L	18732464	18733323	+	860	lincRNA	-	-
FBgn0033598	35.5501	16.7944	44.4598	0	3.90894	0	32.2681	1.30298	4.60019	2.40833e-07	4.91739e-06	Cpr47Eb	2R	11255167	11255983	+	817	protein_coding	-	Chitin_bind_4
FBgn0039613	56.8801	76.0688	38.6607	13.5923	15.6358	11.7229	57.2032	13.6503	2.06351	2.50076e-07	5.07955e-06	CG14527	3R	28880792	28882945	+	2154	protein_coding	-	-
FBgn0264695	88835.5	79624.3	49734.1	30561.3	30321.6	22892.7	72731.3	27925.2	1.381	2.50355e-07	5.07955e-06	Mhc	2L	16766566	16788766	+	9058	protein_coding	-	Myosin_head
FBgn0038309	92.4302	205.484	245.495	17.4758	32.2488	9.59145	181.137	19.772	3.19215	2.50526e-07	5.07955e-06	CG6499	3R	15247163	15249137	-	1773	protein_coding	-	Ammonium_transp
FBgn0263413	203.143	226.231	169.14	106.796	81.1105	108.703	199.505	98.87	1.01376	2.80581e-07	5.61045e-06	CR43459	3R	10093761	10101356	+	7596	lincRNA	-	-
FBgn0039479	62.9744	70.1413	106.317	30.0972	25.4081	14.92	79.8109	23.4751	1.75973	2.88334e-07	5.71816e-06	CG14257	3R	27075870	27082818	+	2628	protein_coding	-	-
FBgn0264987	28.4401	82.9841	139.178	10.6796	20.5219	14.92	83.5342	15.3739	2.44315	3.12997e-07	6.19034e-06	CR44138	3R	13376903	13377395	+	493	lincRNA	-	-
FBgn0037635	434.727	270.686	247.428	158.253	148.54	153.463	317.614	153.419	1.04899	3.18246e-07	6.27703e-06	CG9837	3R	8807679	8813579	-	2642	protein_coding	-	-
FBgn0036466	23.3615	29.6372	36.7276	2.91263	4.88618	1.06572	29.9088	2.95484	3.3215	4.32369e-07	8.34628e-06	CG18581	3L	15049550	15050209	-	660	protein_coding	-	-
FBgn0041709	75.163	67.1776	91.8191	21.3593	16.613	36.2344	78.0532	24.7356	1.66704	4.90499e-07	9.43073e-06	yellow-g	3L	2269881	2272769	-	1344	protein_coding	-	-
FBgn0032069	3918.63	4179.83	2641.49	1550.49	937.168	894.136	3579.99	1127.27	1.667	4.931e-07	9.46818e-06	CG9468	2L	8777661	8781252	-	3160	protein_coding	-	-
FBgn0046258	144.232	209.436	199.103	106.796	65.4747	77.7973	184.257	83.3562	1.14387	5.27493e-07	1.00752e-05	CG12880	3R	27685962	27692790	+	1894	protein_coding	-	-
FBgn0020506	81.2573	36.5525	33.8281	10.6796	4.88618	11.7229	50.546	9.09624	2.47825	5.7295e-07	1.08718e-05	Amyrel	2R	16651095	16652699	-	1549	protein_coding	-	-
FBgn0031542	171.656	139.295	97.6182	51.4565	63.5203	54.3516	136.19	56.4428	1.26918	5.75605e-07	1.09079e-05	CG15414	2L	3480755	3491071	-	1402	protein_coding	-	-
FBgn0261526	24.3772	33.5888	29.962	2.91263	4.88618	2.13143	29.3093	3.31008	3.1367	6.17665e-07	1.16139e-05	NT1	3L	4501652	4508433	-	4104	protein_coding	-	-
FBgn0024289	3744.95	2766.14	1472.97	566.021	637.157	838.719	2661.35	680.633	1.96731	6.61552e-07	1.23749e-05	Sodh-1	3R	7052335	7054541	+	1387	protein_coding	-	ADH_N
FBgn0036678	73.1316	72.1172	74.4218	31.0681	26.3853	21.3143	73.2235	26.2559	1.47555	8.50776e-07	1.55728e-05	CG11905	3L	16928381	16935536	-	4644	protein_coding	-	-
FBgn0039239	232.599	457.401	341.181	126.214	191.538	163.055	343.727	160.269	1.10135	1.01267e-06	1.81917e-05	CG13641	3R	24864191	24864732	-	542	protein_coding	-	-
FBgn0259878	162.515	185.726	207.801	112.622	89.9056	71.403	185.347	91.3101	1.01876	1.01788e-06	1.824e-05	Fs	2R	15223560	15241589	-	3561	protein_coding	-	-
FBgn0030348	146.263	143.246	114.049	66.9905	64.4975	61.8116	134.52	64.4332	1.06052	1.11749e-06	1.97564e-05	CG10352	X	11875306	11877168	-	1491	protein_coding	-	-
FBgn0035545	18.2829	25.6856	37.6942	3.88351	0	0	27.2209	1.2945	4.35778	1.13908e-06	2.00533e-05	CG12607	3L	4446573	4448072	+	1001	protein_coding	-	-
FBgn0044812	11170.8	4855.56	2960.44	776.702	258.967	176.909	6328.95	404.193	3.9687	1.18563e-06	2.07836e-05	TotC	3R	20872988	20873580	+	530	protein_coding	-	-
FBgn0029970	108.682	95.8269	43.4933	18.4467	28.3398	24.5115	82.6673	23.766	1.79785	1.19243e-06	2.08775e-05	Nek2	X	7889066	7891646	-	2581	protein_coding	-	Pkinase
FBgn0267635	31.4872	44.4558	63.7901	11.6505	4.88618	12.7886	46.5777	9.7751	2.26031	1.36951e-06	2.36354e-05	CR45973	3L	20404270	20407558	+	3289	lincRNA	-	-
FBgn0261429	28.4401	71.1292	117.915	13.5923	14.6585	19.1829	72.4948	15.8112	2.20193	1.4241e-06	2.44902e-05	CR42646	2R	5363253	5367357	+	2652	lincRNA	-	-
FBgn0019928	415.428	204.497	332.482	162.136	159.289	133.215	317.469	151.547	1.06556	1.48191e-06	2.5424e-05	Ser8	2R	13434207	13435045	+	839	protein_coding	-	Trypsin
FBgn0032066	406.286	433.691	202.002	76.6993	42.0211	20.2486	347.326	46.323	2.90438	1.64713e-06	2.79935e-05	CG9463	2L	8765273	8768710	-	3198	protein_coding	-	-
FBgn0001229	109.697	133.367	161.408	75.7284	41.0439	54.3516	134.824	57.0413	1.24079	1.72956e-06	2.92232e-05	Hsp67Bc	3L	9371511	9372497	-	987	protein_coding	-	-
FBgn0010038	66.0215	178.811	233.897	43.6895	59.6113	47.9573	159.577	50.4194	1.66283	1.81748e-06	3.04602e-05	GstD2	3R	12371971	12372704	+	734	protein_coding	-	GST_N
FBgn0033519	71.1001	93.8511	136.279	34.9516	45.93	26.6429	100.41	35.8415	1.48367	1.89884e-06	3.17869e-05	CG11825	2R	10420414	10423650	-	1291	protein_coding	-	-
FBgn0034460	79.2259	78.0446	72.4888	29.1263	35.1805	23.4458	76.5864	29.2508	1.38443	2.07967e-06	3.4654e-05	CG18367	2R	19636660	19637400	+	384	protein_coding	-	-
FBgn0002939	1599.75	1163.75	807.042	447.574	263.853	414.564	1190.18	375.331	1.66499	2.10594e-06	3.49711e-05	ninaD	2L	18081628	18083608	+	1788	protein_coding	-	-
FBgn0040352	19.2986	28.6493	4.83259	0	0	0	17.5935	0	6.57312	2.11988e-06	3.51624e-05	CG14416	X	2871884	2872853	-	915	protein_coding	-	-
FBgn0259951	1145.73	656.958	550.915	283.496	239.423	226.998	784.533	249.972	1.64974	2.1971e-06	3.636e-05	Sfp24Ba	2L	3667977	3668551	-	522	protein_coding	-	Kunitz_BPTI
FBgn0034437	92.4302	108.67	94.7187	54.3691	36.1577	29.8401	98.6062	40.1223	1.29261	2.58559e-06	4.20986e-05	CG10051	2R	19363641	19367294	+	2768	protein_coding	-	-
FBgn0031277	1452.47	761.676	1255.51	508.74	393.826	365.541	1156.55	422.702	1.45187	2.67033e-06	4.32533e-05	CG13947	2L	779173	779655	+	483	protein_coding	-	-
FBgn0034856	151.342	145.222	126.614	52.4274	87.9512	51.1544	141.059	63.8443	1.1407	2.68136e-06	4.33836e-05	yellow-d2	2R	23381197	23382591	+	1341	protein_coding	-	-
FBgn0267611	16.2515	53.3469	30.9285	2.91263	3.90894	6.3943	33.509	4.40529	2.9401	2.9035e-06	4.65619e-05	CR45949	2L	9948908	9951122	+	2215	lincRNA	-	-
FBgn0013348	6254.78	4066.22	3673.73	2147.58	2015.06	1652.93	4664.91	1938.52	1.2668	2.98209e-06	4.76641e-05	TpnC41C	2R	5065237	5070210	-	1880	protein_coding	-	-
FBgn0033732	19.2986	36.5525	36.7276	1.94175	7.81788	2.13143	30.8596	3.96369	2.95101	3.08135e-06	4.8927e-05	CG13157	2R	12416044	12418231	+	1904	protein_coding	-	-
FBgn0044817	51.8015	90.8874	66.6897	27.1846	14.6585	25.5772	69.7929	22.4734	1.63762	3.29122e-06	5.19182e-05	Ste12DOR	X	14000210	14000889	+	563	protein_coding	-	-
FBgn0037974	386.988	761.676	853.435	214.564	236.491	206.749	667.366	219.268	1.60581	3.60962e-06	5.62069e-05	CG12224	3R	11980704	11982622	-	1628	protein_coding	-	Aldo_ket_red
FBgn0036602	34.5343	29.6372	14.4978	0	0	2.13143	26.2231	0.710478	5.28245	4.19858e-06	6.46831e-05	CG13042	3L	16307846	16308480	-	571	protein_coding	-	-
FBgn0031654	1627.18	1201.29	897.894	245.632	45.93	77.7973	1242.12	123.12	3.33426	4.46042e-06	6.82255e-05	Jon25Bii	2L	4952243	4953136	-	894	protein_coding	-	Trypsin
FBgn0264488	12.1886	28.6493	58.9575	4.85439	1.95447	4.26287	33.2651	3.69057	3.17745	4.63144e-06	7.03057e-05	CG43896	3L	11976111	11983764	+	6844	protein_coding	-	CBM_14
FBgn0002531	47.7387	36.5525	32.8616	12.6214	7.81788	6.3943	39.0509	8.94453	2.11781	4.79577e-06	7.25011e-05	Lcp1	2R	8430115	8431243	-	1065	protein_coding	-	Chitin_bind_4
FBgn0033725	209.238	179.799	108.25	36.8933	29.3171	8.52573	165.762	24.912	2.72976	5.05063e-06	7.5803e-05	Cpr49Ac	2R	12386666	12390057	+	2117	protein_coding	-	Chitin_bind_4
FBgn0028938	37.5815	46.4316	28.9955	7.76702	11.7268	4.26287	37.6695	7.9189	2.23878	5.0511e-06	7.5803e-05	CG16886	2L	13920707	13923553	-	2433	protein_coding	-	-
FBgn0032132	18.2829	38.5283	17.3973	0	2.93171	3.19715	24.7362	2.04295	3.61726	6.0336e-06	8.90724e-05	CG4382	2L	9598880	9600872	-	1822	protein_coding	-	COesterase
FBgn0003356	15919.3	11219.7	8605.87	5331.09	3252.24	3670.33	11914.9	4084.55	1.5445	6.48632e-06	9.47905e-05	Jon99Cii	3R	29923754	29924615	-	862	protein_coding	-	Trypsin
FBgn0032803	333.155	271.674	165.274	120.389	130.949	131.083	256.701	127.474	1.0093	7.42941e-06	0.000107597	CG13082	2L	19538425	19539740	+	1316	protein_coding	-	-
FBgn0085273	29.4558	47.4195	58.9575	14.5632	8.79512	11.7229	45.2776	11.6937	1.95434	8.21619e-06	0.000117814	CG34244	3L	14235053	14235941	-	829	protein_coding	-	-
FBgn0032535	53.833	50.3832	41.5602	16.5049	7.81788	18.1172	48.5921	14.1467	1.78523	8.70485e-06	0.000124085	Ance-2	2L	13909333	13911719	+	2222	protein_coding	-	Peptidase_M2
FBgn0031701	1559.12	329.961	490.991	115.534	93.8146	72.4687	793.359	93.9392	3.07779	9.25332e-06	0.000130492	TotM	2L	5329857	5330464	+	552	protein_coding	-	-
FBgn0266355	15.2357	10.867	11.5982	0	0	0	12.567	0	6.0882	9.29078e-06	0.000130893	CR45003	X	21409402	21410546	-	626	lincRNA	-	-
FBgn0052641	131.027	117.561	91.8191	61.1653	51.7935	46.8915	113.469	53.2834	1.08749	9.4165e-06	0.000132535	CG32641	X	13184478	13184996	+	466	protein_coding	-	DnaJ
FBgn0263109	68.053	34.5767	57.991	19.4175	8.79512	17.0515	53.5402	15.088	1.82875	1.01031e-05	0.000140696	CG43366	2R	5893895	5931363	+	7712	protein_coding	-	Serpin
FBgn0030615	380.894	298.348	184.605	145.632	113.359	163.055	287.949	140.682	1.03377	1.01773e-05	0.000141458	Cyp4s3	X	15113302	15116542	-	2288	protein_coding	-	p450
FBgn0035886	883.673	1260.57	816.707	108.738	327.374	117.229	986.983	184.447	2.41946	1.05159e-05	0.000145328	Jon66Ci	3L	8391540	8392377	+	838	protein_coding	-	Trypsin
FBgn0267042	142.2	78.0446	90.8526	46.6021	46.9073	34.1029	103.699	42.5374	1.28151	1.05742e-05	0.000145866	CG45486	X	19909318	19910117	-	646	protein_coding	-	-
FBgn0000658	238.693	160.041	117.915	93.2042	71.3382	70.3373	172.216	78.2932	1.13495	1.0575e-05	0.000145866	fj	2R	18232761	18236311	+	3551	protein_coding	-	-
FBgn0266262	23.3615	26.6735	15.4643	0.970877	3.90894	0	21.8331	1.62661	3.71574	1.13384e-05	0.000154485	CR44957	X	4311989	4314769	-	835	lincRNA	-	-
FBgn0264711	131.027	103.73	111.149	66.0196	50.8162	52.2201	115.302	56.352	1.0309	1.16918e-05	0.000158407	CG43980	3L	21644958	21666306	+	5927	protein_coding	-	BTB
FBgn0038879	19.2986	10.867	7.73214	0	0	0	12.6326	0	6.09443	1.20895e-05	0.000163338	CG17298	3R	21283197	21284050	+	495	protein_coding	-	-
FBgn0038070	55.8644	61.2502	47.3593	24.2719	15.6358	15.9858	54.8246	18.6311	1.55332	1.30543e-05	0.000174101	CG6753	3R	12640163	12642482	-	1774	protein_coding	-	-
FBgn0032002	334.171	628.308	917.225	147.573	205.219	132.149	626.568	161.647	1.95443	1.51611e-05	0.000198009	CG8353	2L	8214045	8215239	+	1011	protein_coding	-	-
FBgn0030394	17.2672	20.746	23.1964	1.94175	2.93171	0	20.4032	1.62449	3.61952	1.55662e-05	0.000202935	Cpr11A	X	12486970	12489448	+	1326	protein_coding	-	Chitin_bind_4
FBgn0053093	65.0058	39.5162	23.1964	10.6796	6.84065	11.7229	42.5728	9.74773	2.12867	1.65115e-05	0.00021372	CG33093	3R	22530694	22531922	-	1055	protein_coding	-	2OG-FeII_Oxy
FBgn0051606	238.693	151.15	102.451	13.5923	5.86341	0	164.098	6.48523	4.65371	2.12242e-05	0.000268087	CG31606	2L	8147611	8148356	+	690	protein_coding	-	-
FBgn0085411	57.8958	69.1534	38.6607	19.4175	20.5219	15.9858	55.2366	18.6417	1.56343	2.26661e-05	0.000283839	CG34382	3L	9878985	9884493	+	3091	protein_coding	-	-
FBgn0028396	21291.4	9581.7	5700.52	2489.33	1785.41	976.197	12191.2	1750.31	2.80011	2.28343e-05	0.000285616	TotA	3R	20871036	20871700	+	579	protein_coding	-	-
FBgn0039719	426.601	249.94	193.303	150.486	147.562	132.149	289.948	143.399	1.01435	2.34819e-05	0.000292706	CG15515	3R	29905464	29906448	+	472	protein_coding	-	Chitin_bind_4
FBgn0265681	33.5186	23.7097	23.1964	5.82526	4.88618	4.26287	26.8083	4.99144	2.41986	2.36778e-05	0.000294388	CR44488	2L	18433459	18434096	+	638	lincRNA	-	-
FBgn0032280	48.7544	55.3227	48.3259	23.3011	6.84065	1.06572	50.801	10.4025	2.27209	2.57846e-05	0.000316243	CG17105	2L	10681030	10681775	+	746	protein_coding	-	-
FBgn0030107	12.1886	22.7218	26.096	1.94175	0	0	20.3355	0.647251	4.93406	2.66477e-05	0.000325178	CG15370	X	9225437	9226688	+	1252	protein_coding	-	-
FBgn0265873	42.6601	94.839	133.379	29.1263	39.0894	19.1829	90.2928	29.1329	1.62926	2.92808e-05	0.000353147	CR44662	X	15077498	15081255	-	3758	lincRNA	-	-
FBgn0264775	168.609	253.892	387.573	92.2333	162.221	119.36	270.025	124.605	1.1163	2.95178e-05	0.00035512	CG44013	3R	15508896	15509917	-	940	protein_coding	-	-
FBgn0003357	10473	7314.46	6258.2	4057.3	2377.61	2652.57	8015.23	3029.16	1.40379	3.00405e-05	0.000360466	Jon99Ciii	3R	29922216	29923455	+	1240	protein_coding	-	Trypsin
FBgn0030390	30.4715	18.7702	9.66517	0.970877	0	2.13143	19.6356	1.0341	4.28058	3.30013e-05	0.000391826	CG15731	X	12456409	12457763	-	1180	protein_coding	-	-
FBgn0030539	90.3987	48.4074	51.2254	17.4758	19.5447	28.7744	63.3438	21.9316	1.53428	3.35508e-05	0.000395758	CG1368	X	14174756	14175670	+	774	protein_coding	-	-
FBgn0085254	16.2515	12.8428	19.3303	0	0.977235	0	16.1415	0.325745	5.48867	3.55071e-05	0.000415789	CG34225	2R	11245406	11245995	+	590	protein_coding	-	-
FBgn0000071	44.6915	61.2502	39.6272	14.5632	21.4992	10.6572	48.523	15.5732	1.63332	4.09807e-05	0.000470759	Ama	3R	6762593	6765261	+	1946	protein_coding	-	I-set
FBgn0029924	59.9273	58.2865	31.8951	17.4758	16.613	14.92	50.0363	16.3363	1.61172	4.29116e-05	0.000489064	CG4586	X	6969918	6972265	+	2240	protein_coding	-	-
FBgn0034022	47.7387	43.4679	32.8616	9.70877	13.6813	14.92	41.356	12.77	1.69833	4.38497e-05	0.000497405	CG12964	2R	15485953	15497231	-	3942	protein_coding	-	-
FBgn0032067	32.5029	47.4195	12.5647	7.76702	1.95447	5.32858	30.829	5.01669	2.6189	4.66882e-05	0.000525088	CG9465	2L	8769159	8772344	-	2953	protein_coding	-	-
FBgn0038068	103.603	95.8269	82.154	48.5439	45.93	44.7601	93.8613	46.4113	1.01463	4.71653e-05	0.000529223	CG11600	3R	12636540	12637976	+	1330	protein_coding	-	-
FBgn0052160	22.3458	10.867	23.1964	1.94175	0	0	18.803	0.647251	4.81988	4.83593e-05	0.000540945	CR32160	3L	16308940	16311318	+	2138	lincRNA	-	-
FBgn0034618	5818.02	5086.73	3009.73	2100.01	2358.07	1768.02	4638.16	2075.37	1.16011	5.25941e-05	0.000581584	CG9485	2R	21312399	21319569	+	5491	protein_coding	-	-
FBgn0030509	75.163	92.8632	44.4598	32.0389	25.4081	23.4458	70.8287	26.9643	1.39008	5.41373e-05	0.000596846	CG11162	X	13676894	13677882	+	919	protein_coding	-	-
FBgn0030438	29.4558	17.7823	8.69865	1.94175	0	1.06572	18.6456	1.00249	4.21458	5.4139e-05	0.000596846	CG15721	X	12970711	12973967	+	2804	protein_coding	-	-
FBgn0262887	88.3673	94.839	69.5892	45.6312	41.0439	29.8401	84.2652	38.8384	1.11273	7.21047e-05	0.000760219	CR43242	2L	23069005	23070724	+	1090	lincRNA	-	-
FBgn0039666	603.335	69.1534	134.346	18.4467	28.3398	19.1829	268.945	21.9898	3.6119	8.21417e-05	0.000851794	Diedel	3R	29493852	29494267	+	416	protein_coding	-	-
FBgn0265426	136.106	88.9116	43.4933	30.0972	30.2943	38.3658	89.5036	32.9191	1.44351	8.83034e-05	0.000907897	CR44338	3R	7263440	7264292	+	853	lincRNA	-	-
FBgn0032068	1763.28	1694.26	1129.86	752.43	410.439	337.832	1529.13	500.234	1.61177	9.63196e-05	0.000978741	CG9466	2L	8772946	8776263	-	3074	protein_coding	-	-
FBgn0038530	1928.84	4109.69	3021.33	1240.78	1452.17	1057.19	3019.96	1250.05	1.2725	0.000103261	0.00103813	AttD	3R	17625268	17626086	+	742	protein_coding	-	-
FBgn0030569	45.7072	42.48	48.3259	12.6214	15.6358	21.3143	45.5043	16.5238	1.46799	0.000105219	0.00105561	CG9411	X	14472408	14480086	-	3684	protein_coding	-	-
FBgn0262608	89.383	80.0204	61.8571	34.9516	38.1122	35.1687	77.0868	36.0775	1.09391	0.000113161	0.00111827	CG43134	X	4247313	4247785	+	407	protein_coding	-	-
FBgn0052564	98.5245	108.67	64.7566	52.4274	40.0666	26.6429	90.6503	39.7123	1.18504	0.000116611	0.00114844	CG32564	X	17206407	17207854	+	1448	protein_coding	-	-
FBgn0036588	7.11001	27.6614	34.7946	4.85439	1.95447	2.13143	23.1887	2.9801	2.95412	0.000117126	0.00115195	CG13068	3L	16269392	16269911	+	450	protein_coding	-	-
FBgn0028519	36.5658	35.5646	26.096	4.85439	13.6813	7.46002	32.7421	8.66523	1.91471	0.000120668	0.00117959	CG4500	2L	14027001	14029368	+	2206	protein_coding	-	AMP-binding
FBgn0028573	52.8172	48.4074	81.1874	27.1846	27.3626	15.9858	60.804	23.511	1.36629	0.000123128	0.00119958	prc	3L	11958872	11966131	-	5535	protein_coding	-	-
FBgn0267476	20.3143	17.7823	21.2634	2.91263	0.977235	5.32858	19.7867	3.07282	2.70731	0.000132199	0.00127426	CR45826	3L	1927623	1928152	-	530	lincRNA	-	-
FBgn0000639	2940.5	2955.82	1273.87	220.389	43.9756	5.32858	2390.06	89.8978	4.73216	0.00014559	0.00138856	Fbp1	3L	14094589	14098053	-	3465	protein_coding	-	-
FBgn0025835	96.493	99.7785	47.3593	35.9225	40.0666	18.1172	81.2103	31.3688	1.36573	0.000148073	0.00140839	CG17707	X	142731	148426	-	3791	protein_coding	-	-
FBgn0267047	40.6286	7.90325	7.73214	0	1.95447	1.06572	18.7547	1.00673	4.22085	0.000150026	0.00142339	CG45491	X	19938232	19938994	-	609	protein_coding	-	-
FBgn0037181	20.3143	14.8186	17.3973	1.94175	0	4.26287	17.5101	2.06821	3.1124	0.000161511	0.00151843	CG11370	3L	22712155	22713660	+	1323	protein_coding	-	-
FBgn0266419	15.2357	12.8428	9.66517	0.970877	0	0	12.5812	0.323626	5.12768	0.000171704	0.00159974	CR45059	X	20739538	20740308	+	771	lincRNA	-	-
FBgn0000640	2018.23	1776.26	894.995	201.942	42.9983	8.52573	1563.16	84.4888	4.209	0.000195089	0.00178323	Fbp2	2L	9426784	9427917	+	1074	protein_coding	-	adh_short
FBgn0085209	158.452	115.585	87.9531	47.573	78.1788	50.0887	120.663	58.6135	1.03901	0.000198646	0.00181345	CG34180	2L	6060510	6060938	+	376	protein_coding	-	-
FBgn0262029	145.247	130.404	78.2879	48.5439	48.8618	74.6002	117.98	57.3353	1.04372	0.000208445	0.00188747	d	2L	8466817	8488671	+	6113	protein_coding	-	Myosin_head
FBgn0051928	3.04715	47.4195	44.4598	0	0	0	31.6421	0	7.42138	0.00021146	0.00190762	CG31928	2L	1492295	1493859	+	1565	protein_coding	-	Asp
FBgn0264961	41.6444	63.226	57.991	16.5049	28.3398	20.2486	54.2871	21.6978	1.32307	0.000215794	0.00194188	CR44130	2R	6047170	6047738	-	569	lincRNA	-	-
FBgn0040251	40.6286	43.4679	47.3593	16.5049	18.5675	15.9858	43.8186	17.0194	1.36365	0.000236793	0.00209444	Ugt86Di	3R	11151026	11153849	-	2556	protein_coding	-	UDPGT
FBgn0083994	7.11001	10.867	5.7991	0	0	0	7.92536	0	5.42356	0.000255142	0.00223088	CR41352	X	22917105	22917498	+	394	lincRNA	-	-
FBgn0261681	15.2357	17.7823	33.8281	3.88351	5.86341	3.19715	22.2821	4.31469	2.36451	0.000269418	0.00232454	CG42728	3L	15527620	15528196	-	577	protein_coding	-	CBM_14
FBgn0262893	27.4243	18.7702	17.3973	2.91263	3.90894	6.3943	21.1973	4.40529	2.27719	0.000327319	0.00271928	CG43248	3L	15530085	15531473	-	846	protein_coding	-	-
FBgn0035412	42.6601	28.6493	66.6897	14.5632	13.6813	20.2486	45.9997	16.1644	1.51446	0.000347539	0.00284809	CG14957	3L	3187563	3188106	+	423	protein_coding	-	-
FBgn0033720	48.7544	59.2744	51.2254	27.1846	18.5675	23.4458	53.0847	23.0659	1.20279	0.000357195	0.00291241	CG13160	2R	12371594	12375081	+	2736	protein_coding	-	-
FBgn0263090	25.3929	25.6856	54.125	13.5923	0	8.52573	35.0678	7.37267	2.25257	0.000366638	0.00297434	CR43358	2L	18293733	18294056	-	271	lincRNA	-	-
FBgn0003319	15.2357	21.7339	22.2299	4.85439	2.93171	4.26287	19.7332	4.01632	2.29893	0.000396184	0.00318728	Sb	3R	16116161	16145284	+	4180	protein_coding	-	Trypsin
FBgn0036879	27.4243	25.6856	18.3638	4.85439	7.81788	5.32858	23.8246	6.00028	1.98593	0.000431141	0.00343421	Cpr76Bb	3L	19519649	19520419	+	771	protein_coding	-	Chitin_bind_4
FBgn0031255	20.3143	38.5283	39.6272	10.6796	9.77235	10.6572	32.8233	10.3697	1.66456	0.000457665	0.00361114	BBS8	2L	422873	425321	+	2259	protein_coding	-	-
FBgn0040842	21.33	14.8186	13.5312	1.94175	2.93171	3.19715	16.56	2.6902	2.6263	0.000478226	0.00374221	CG15212	3L	5131545	5132127	+	445	protein_coding	-	-
FBgn0039946	91.4145	46.4316	79.2544	36.8933	36.1577	23.4458	72.3668	32.1656	1.1652	0.000479331	0.003744	ATbp	X	23106003	23108331	+	2269	protein_coding	-	-
FBgn0051789	4.06286	14.8186	14.4978	0	0	1.06572	11.1264	0.355239	4.95356	0.000492744	0.00382609	CG31789	2L	18605928	18606684	+	695	protein_coding	-	-
FBgn0000278	1250.35	819.962	490.024	308.739	333.237	168.383	853.444	270.12	1.65925	0.000519889	0.00400257	CecB	3R	30213315	30213797	-	425	protein_coding	-	-
FBgn0052814	54.8487	36.5525	33.8281	12.6214	20.5219	13.8543	41.7431	15.6659	1.41054	0.000572249	0.00433433	CG32814	X	1019795	1026700	-	1664	protein_coding	-	-
FBgn0033137	62.9744	56.3107	28.9955	15.534	23.4536	18.1172	49.4269	19.035	1.37444	0.000586251	0.00442189	Tsp42Ep	2R	7054405	7057548	-	2892	protein_coding	-	Tetraspannin
FBgn0263505	10.1572	4.93953	5.7991	0	0	0	6.96526	0	5.23603	0.000591294	0.00445761	CR43494	X	2750919	2751416	-	498	lincRNA	-	-
FBgn0266742	53.833	58.2865	93.7522	25.2428	40.0666	28.7744	68.6239	31.3613	1.13006	0.000668828	0.00492683	CR45215	3R	8316984	8318006	+	1023	lincRNA	-	-
FBgn0036607	18.2829	19.7581	10.6317	2.91263	0	4.26287	16.2242	2.39183	2.78131	0.000690839	0.00506068	CG13059	3L	16323672	16324308	+	572	protein_coding	-	-
FBgn0054046	22.3458	9.87906	19.3303	3.88351	1.95447	3.19715	17.1851	3.01171	2.51291	0.000711493	0.00518838	CR34046	3R	31709275	31709788	+	444	lincRNA	-	-
FBgn0004192	2.03143	11.8549	7.73214	0	0	0	7.20615	0	5.28831	0.000718128	0.00522626	snRNA:U2:34ABb	2L	13215839	13216030	+	192	snRNA	-	-
FBgn0265074	29.4558	37.5404	30.9285	9.70877	5.86341	17.0515	32.6416	10.8746	1.59749	0.000773278	0.00554412	CR44185	2L	135402	136128	+	727	lincRNA	-	-
FBgn0261833	36.5658	23.7097	47.3593	12.6214	14.6585	10.6572	35.8783	12.6457	1.50213	0.000778776	0.00557527	CR42765	3R	26324499	26325294	-	588	lincRNA	-	-
FBgn0037503	40.6286	45.4437	16.4308	6.79614	12.7041	11.7229	34.1677	10.4077	1.71626	0.000786057	0.00561353	CG14598	3R	7439760	7441976	+	1230	protein_coding	-	-
FBgn0034507	39.6129	242.037	107.283	25.2428	26.3853	19.1829	129.644	23.6037	2.45677	0.000789141	0.00563001	CG11192	2R	20354108	20355067	-	960	protein_coding	-	Trypsin
FBgn0034047	15.2357	24.6977	39.6272	2.91263	7.81788	9.59145	26.5202	6.77399	1.98041	0.000793811	0.00565247	CG12970	2R	15855961	15857522	+	1137	protein_coding	-	-
FBgn0037996	377.846	283.529	210.701	128.156	37.1349	39.4315	290.692	68.2407	2.08964	0.000808615	0.00572378	CG4830	3R	12208159	12210360	-	1861	protein_coding	-	AMP-binding
FBgn0053465	21.33	31.613	28.9955	11.6505	7.81788	5.32858	27.3128	8.26566	1.71692	0.000828166	0.00583662	CG33465	2R	15819114	15821114	-	1610	protein_coding	-	Trypsin
FBgn0042173	73.1316	39.5162	28.029	7.76702	4.88618	27.7086	46.8923	13.4539	1.81436	0.000869026	0.00606269	CG18853	2R	7829062	7830429	+	1157	protein_coding	-	-
FBgn0262148	52.8172	38.5283	28.029	17.4758	16.613	10.6572	39.7915	14.9153	1.40841	0.000892805	0.00619578	CR42874	2L	1989450	1990894	+	1374	lincRNA	-	-
FBgn0033594	29.4558	15.8065	17.3973	5.82526	3.90894	5.32858	20.8865	5.02093	2.05598	0.000900001	0.00623975	CG13226	2R	11244247	11245199	+	953	protein_coding	-	-
FBgn0267681	35.5501	52.359	91.8191	25.2428	22.4764	27.7086	59.9094	25.1426	1.25604	0.00102337	0.00695715	CR46017	3R	12614392	12615200	-	809	lincRNA	-	-
FBgn0263040	19.2986	6.91534	3.86607	0	0	1.06572	10.0267	0.355239	4.79818	0.00103935	0.00704416	CG43335	3R	15635468	15636489	+	846	protein_coding	-	Trypsin
FBgn0037788	2245.75	1429.5	1041.91	760.197	803.287	661.81	1572.38	741.765	1.08377	0.00119654	0.00791706	CG3940	3R	10112237	10120081	+	2376	protein_coding	-	-
FBgn0085277	6.0943	19.7581	8.69865	0.970877	0	1.06572	11.517	0.678865	4.10306	0.00122804	0.0080849	CG34248	3L	16270369	16270902	-	534	protein_coding	-	-
FBgn0058298	94.4616	64.2139	57.991	47.573	26.3853	30.9058	72.2222	34.9547	1.04364	0.00125419	0.0082234	CG40298	3L	23726829	23727989	+	1161	protein_coding	-	-
FBgn0037129	9.14145	13.8307	9.66517	1.94175	0	0	10.8791	0.647251	4.03311	0.00140413	0.00903891	CG14565	3L	21743248	21744269	-	1022	protein_coding	-	-
FBgn0052496	16.2515	5.92744	4.83259	0	0	1.06572	9.00383	0.355239	4.64323	0.00152718	0.00966367	CR32496	X	17898643	17899498	+	778	pseudogene	-	Fibrinogen_C
FBgn0032824	9.14145	2.96372	5.7991	0	0	0	5.96809	0	5.01325	0.00159078	0.0100072	CG13962	2L	19813704	19814532	-	769	protein_coding	-	-
FBgn0027571	56568.3	43582.5	26353.1	24194.3	19883.8	18666	42167.9	20914.7	1.01162	0.00162079	0.0101497	CG3523	2L	3056598	3068177	+	8744	protein_coding	-	Acyl_transf_1
FBgn0034183	59.9273	71.1292	28.9955	16.5049	25.4081	25.5772	53.3507	22.4967	1.24692	0.00167023	0.0104233	CG9642	2R	17046839	17048794	+	1790	protein_coding	-	SET
FBgn0261925	6.0943	39.5162	18.3638	4.85439	5.86341	0	21.3248	3.5726	2.55871	0.00171364	0.010612	CG42792	2L	15864929	15865461	-	468	protein_coding	-	-
FBgn0033158	33.5186	21.7339	22.2299	13.5923	5.86341	2.13143	25.8275	7.19571	1.82782	0.00183848	0.0112553	CG12164	2R	7311395	7313495	+	1554	protein_coding	-	-
FBgn0052834	8.12573	1.97581	7.73214	0	0	0	5.94456	0	5.00861	0.00184253	0.011272	CG32834	2R	22982542	22984293	-	1752	protein_coding	-	Trypsin
FBgn0264550	27.4243	40.5042	36.7276	13.5923	11.7268	17.0515	34.8854	14.1235	1.30961	0.00190927	0.0116005	CR43929	3L	20921182	20921749	-	479	lincRNA	-	-
FBgn0034624	33.5186	20.746	25.1294	9.70877	7.81788	9.59145	26.4647	9.03937	1.54989	0.00191521	0.0116268	CG17974	2R	21348945	21350578	-	1033	protein_coding	-	SCP
FBgn0000826	13.2043	21.7339	19.3303	1.94175	0.977235	8.52573	18.0895	3.81491	2.27525	0.00194214	0.0117558	png	X	1356488	1357601	-	1114	protein_coding	-	Pkinase
FBgn0037972	46.7229	53.3469	45.4263	17.4758	24.4309	27.7086	48.4987	23.2051	1.0674	0.00203331	0.0121755	CG10005	3R	11975156	11977197	-	1171	protein_coding	-	-
FBgn0030398	42.6601	45.4437	25.1294	16.5049	17.5902	11.7229	37.7444	15.2727	1.29966	0.00211317	0.0125758	Cpr11B	X	12553124	12554235	+	818	protein_coding	-	Chitin_bind_4
FBgn0267055	11.1729	4.93953	29.962	0	4.88618	0	15.3581	1.62873	3.21708	0.00213962	0.0126995	CR45499	X	21155432	21156173	-	588	pseudogene	-	-
FBgn0035865	5.07858	9.87906	15.4643	0	0.977235	1.06572	10.1406	0.680984	3.92001	0.00223568	0.0131484	CG7201	3L	8290286	8295327	-	1662	protein_coding	-	-
FBgn0266030	4.06286	14.8186	14.4978	0	0.977235	2.13143	11.1264	1.03622	3.4609	0.00227634	0.0133388	CR44795	2L	5615230	5615661	+	432	lincRNA	-	-
FBgn0034288	15.2357	26.6735	32.8616	8.73789	2.93171	10.6572	24.9236	7.44226	1.75374	0.00235173	0.013692	CG5084	2R	18018665	18020211	+	1182	protein_coding	-	-
FBgn0266654	18.2829	4.93953	2.89955	0	0.977235	0	8.70732	0.325745	4.59429	0.00240257	0.0139265	CR45161	3L	19989706	19990739	+	1034	lincRNA	-	-
FBgn0267666	13.2043	12.8428	7.73214	0.970877	2.93171	0	11.2597	1.30086	3.08429	0.00243378	0.0140736	CR46004	3L	10306678	10320600	+	7941	lincRNA	-	-
FBgn0003046	61.9587	18.7702	22.2299	4.85439	15.6358	10.6572	34.3196	10.3824	1.72379	0.0024657	0.0142185	Pcp	2L	7021682	7022470	+	718	protein_coding	-	Chitin_bind_4
FBgn0037128	20.3143	53.3469	45.4263	16.5049	16.613	13.8543	39.6959	15.6574	1.34181	0.00247333	0.0142487	CG14572	3L	21741534	21742441	+	908	protein_coding	-	-
FBgn0039078	66.0215	58.2865	36.7276	21.3593	28.3398	27.7086	53.6786	25.8026	1.05675	0.00253447	0.0145226	CG4374	3R	23408684	23472278	-	5842	protein_coding	-	-
FBgn0052279	13.2043	36.5525	144.978	7.76702	10.7496	4.26287	64.9115	7.59316	3.09321	0.00254306	0.0145603	Drsl2	3L	3314349	3314681	+	333	protein_coding	-	-
FBgn0040367	17.2672	5.92744	8.69865	0.970877	1.95447	0	10.6311	0.975116	3.41468	0.00257798	0.0147176	CG11382	X	1209970	1211853	+	1884	protein_coding	-	-
FBgn0039255	10.1572	13.8307	19.3303	2.91263	2.93171	3.19715	14.4394	3.01383	2.2638	0.00271573	0.0153566	CG13646	3R	24947632	24949539	+	1584	protein_coding	-	Aa_trans
FBgn0036605	16.2515	4.93953	9.66517	0.970877	0.977235	1.06572	10.2854	1.00461	3.35604	0.00283176	0.0158625	CG13041	3L	16318954	16319526	-	513	protein_coding	-	-
FBgn0039482	73.1316	51.3711	34.7946	37.8642	13.6813	11.7229	53.0991	21.0895	1.32462	0.00306157	0.0169209	CG14258	3R	27093143	27094224	+	901	protein_coding	-	-
FBgn0040699	11.1729	13.8307	6.76562	0.970877	0.977235	2.13143	10.5897	1.35985	2.97739	0.00316173	0.0173423	CG15024	3L	4462974	4463823	-	495	protein_coding	-	-
FBgn0001254	6.0943	14.8186	13.5312	0.970877	1.95447	2.13143	11.4814	1.68559	2.77804	0.00319118	0.0174773	ImpE2	3L	3510974	3512681	-	1708	protein_coding	-	-
FBgn0037992	50.7858	22.7218	15.4643	9.70877	5.86341	12.7886	29.6573	9.45359	1.65283	0.00322521	0.0176437	CG4702	3R	12121583	12128201	-	1459	protein_coding	-	-
FBgn0267691	20.3143	13.8307	5.7991	3.88351	0	2.13143	13.3147	2.00498	2.72878	0.00325538	0.0177993	CR46027	2R	12419702	12420291	-	590	pseudogene	-	-
FBgn0036363	21.33	57.2986	66.6897	10.6796	4.88618	31.9715	48.4394	15.8458	1.62486	0.00329249	0.0179441	CG10140	3L	13439317	13440470	-	969	protein_coding	-	CBM_14
FBgn0265940	6.0943	12.8428	12.5647	1.94175	0.977235	1.06572	10.5006	1.32824	2.97788	0.00334333	0.0181781	CR44727	2L	14234754	14235156	+	403	lincRNA	-	-
FBgn0263041	10.1572	5.92744	5.7991	0	0.977235	0	7.29457	0.325745	4.34083	0.00334669	0.0181847	CG43336	3R	15637168	15638181	+	840	protein_coding	-	Trypsin
FBgn0051080	11.1729	5.92744	4.83259	0	0.977235	0	7.31097	0.325745	4.34345	0.00351568	0.0189327	TwdlH	3R	26633732	26634714	+	920	protein_coding	-	-
FBgn0260868	12.1886	11.8549	14.4978	4.85439	0.977235	1.06572	12.8471	2.29911	2.46681	0.00358311	0.0192568	CG42578	X	20446371	20446703	+	333	protein_coding	-	-
FBgn0264444	5.07858	3.95162	5.7991	0	0	0	4.9431	0	4.74306	0.00360124	0.019336	CR43862	X	20686819	20687653	+	667	lincRNA	-	-
FBgn0052855	35.5501	57.2986	59.9241	23.3011	20.5219	30.9058	50.9242	24.9096	1.03713	0.00362067	0.0194187	CG32855	3R	16078980	16080992	-	2013	protein_coding	-	-
FBgn0044809	3.04715	5.92744	5.7991	0	0	0	4.92456	0	4.7387	0.00386133	0.0204522	TotZ	3R	20877736	20878363	+	573	protein_coding	-	-
FBgn0002577	24.3772	26.6735	24.1629	7.76702	12.7041	7.46002	25.0712	9.31036	1.42521	0.00423577	0.0221842	m	X	11754273	11769508	+	3405	protein_coding	-	Zona_pellucida
FBgn0262362	42.6601	31.613	13.5312	11.6505	9.77235	9.59145	29.2681	10.3381	1.49752	0.00429244	0.0224163	CG43060	3R	8041224	8055970	+	1196	protein_coding	-	-
FBgn0036436	35.5501	53.3469	28.9955	9.70877	15.6358	24.5115	39.2975	16.6187	1.2496	0.00430922	0.0224958	CG4914	3L	14674538	14678147	-	1657	protein_coding	-	Trypsin
FBgn0000279	3406.71	2480.63	1442.04	1128.16	1343.7	684.19	2443.13	1052.02	1.21543	0.00446195	0.0231845	CecC	3R	30216484	30216938	+	386	protein_coding	-	-
FBgn0032284	16.2515	16.7944	25.1294	5.82526	8.79512	2.13143	19.3918	5.58394	1.78409	0.00446898	0.0232128	CG7294	2L	10688734	10689271	-	538	protein_coding	-	-
FBgn0033204	191.97	286.493	660.131	122.331	111.405	157.726	379.531	130.487	1.54081	0.00474172	0.0242814	CG2065	2R	7663786	7665269	+	1233	protein_coding	-	adh_short
FBgn0036226	13.2043	24.6977	30.9285	3.88351	8.79512	9.59145	22.9435	7.42336	1.63645	0.00474784	0.0242944	CG7252	3L	11947675	11949248	+	1514	protein_coding	-	CBM_14
FBgn0037761	20.3143	14.8186	9.66517	0.970877	5.86341	3.19715	14.9327	3.34381	2.15728	0.00480348	0.0245111	CG8534	3R	9812747	9813939	+	990	protein_coding	-	ELO
FBgn0030826	35.5501	14.8186	14.4978	6.79614	5.86341	7.46002	21.6221	6.70652	1.68844	0.00511333	0.0257747	CG12995	X	17209368	17209997	-	630	protein_coding	-	-
FBgn0003525	33.5186	33.5888	37.6942	15.534	13.6813	19.1829	34.9339	16.1327	1.11881	0.00515275	0.0259283	stg	3R	29251826	29255800	-	3064	protein_coding	-	Rhodanese
FBgn0267085	5.07858	5.92744	8.69865	0.970877	0	0	6.56822	0.323626	4.19245	0.00529573	0.0264915	CR45529	X	5810492	5811006	+	515	lincRNA	-	-
FBgn0053474	15.2357	17.7823	31.8951	6.79614	4.88618	9.59145	21.6377	7.09126	1.61875	0.0054194	0.0270541	CG33474	2R	10421706	10422989	+	1284	protein_coding	-	-
FBgn0038007	14.22	25.6856	21.2634	7.76702	7.81788	4.26287	20.3897	6.61592	1.61712	0.00544423	0.0271407	Cyp313a3	3R	12237138	12239266	-	1777	protein_coding	-	p450
FBgn0266927	25.3929	21.7339	26.096	6.79614	14.6585	4.26287	24.4076	8.57251	1.50012	0.0055829	0.0276986	CR45378	3L	392006	393255	-	1250	lincRNA	-	-
FBgn0051081	2.03143	7.90325	10.6317	0.970877	0	0	6.85546	0.323626	4.25563	0.00568102	0.0280702	TwdlR	3R	26634885	26635998	+	1059	protein_coding	-	-
FBgn0035792	10.1572	6.91534	2.89955	0	0	1.06572	6.65735	0.355239	4.20794	0.0057947	0.0285346	CG7548	3L	7505540	7506217	-	678	protein_coding	-	-
FBgn0040797	3.04715	7.90325	2.89955	0	0	0	4.61665	0	4.64433	0.00593448	0.0290944	CG13066	3L	16272909	16273608	+	501	protein_coding	-	-
FBgn0267264	3.04715	7.90325	8.69865	0.970877	0	0	6.54968	0.323626	4.18913	0.00594998	0.0291605	CR45700	2L	19322938	19326106	+	3169	lincRNA	-	-
FBgn0266275	7.11001	8.89116	11.5982	2.91263	0	0	9.19979	0.970877	3.2122	0.00598452	0.0292902	CR44960	X	15082616	15083753	-	1078	lincRNA	-	-
FBgn0266949	10.1572	6.91534	26.096	1.94175	4.88618	2.13143	14.3895	2.98645	2.2651	0.00605907	0.0295652	CR45400	3L	127321	127666	-	346	lincRNA	-	-
FBgn0265762	27.4243	15.8065	16.4308	11.6505	2.93171	1.06572	19.8872	5.21598	1.91297	0.00615516	0.0298732	CG44569	2R	19842495	19843668	-	1174	protein_coding	-	-
FBgn0266238	12.1886	16.7944	11.5982	2.91263	3.90894	3.19715	13.5271	3.33957	2.01726	0.00627277	0.030302	CR44933	3R	7037878	7039678	+	1237	lincRNA	-	-
FBgn0036468	17.2672	15.8065	30.9285	7.76702	8.79512	5.32858	21.3341	7.29691	1.544	0.00691474	0.0326631	CG13461	3L	15051931	15052490	-	560	protein_coding	-	-
FBgn0265343	10.1572	7.90325	7.73214	0	0.977235	2.13143	8.59752	1.03622	3.08589	0.00692853	0.0327069	CR44297	2R	10052643	10052995	-	353	lincRNA	-	-
FBgn0267197	8.12573	4.93953	0.966517	0	0	0	4.67726	0	4.65998	0.00717752	0.0335808	CR45637	3R	16209425	16209833	+	409	lincRNA	-	-
FBgn0266975	7.11001	0.987906	5.7991	0	0	0	4.63234	0	4.64833	0.00719953	0.0336574	CR45426	3L	2319386	2319919	-	534	lincRNA	-	-
FBgn0085276	15.2357	7.90325	0	0	0	1.06572	7.713	0.355239	4.41988	0.00727086	0.0339034	CG34247	3L	16261185	16261605	-	353	protein_coding	-	-
FBgn0265377	17.2672	35.5646	28.9955	15.534	7.81788	8.52573	27.2758	10.6259	1.35709	0.00761946	0.0352342	CR44318	3R	8287169	8287698	+	465	lincRNA	-	-
FBgn0267619	31.4872	31.613	33.8281	16.5049	9.77235	18.1172	32.3094	14.7981	1.13089	0.00772336	0.0356578	CR45957	3L	21767229	21767915	+	687	lincRNA	-	-
FBgn0263038	14.22	19.7581	21.2634	5.82526	3.90894	8.52573	18.4138	6.08665	1.60707	0.00775963	0.0357911	CG43333	2L	14163508	14180686	-	4314	protein_coding	-	-
FBgn0031961	18.2829	28.6493	21.2634	6.79614	12.7041	5.32858	22.7318	8.27626	1.45135	0.00783966	0.036057	CG7102	2L	7883282	7887513	-	2264	protein_coding	-	BTB
FBgn0000564	19.2986	28.6493	4.83259	5.82526	1.95447	5.32858	17.5935	4.36944	2.01172	0.0081262	0.0371041	Eh	3R	17446642	17448858	-	704	protein_coding	-	-
FBgn0265846	29.4558	13.8307	14.4978	10.6796	3.90894	0	19.2614	4.86286	1.96503	0.00849088	0.0383107	CR44635	2R	20137345	20137520	+	176	lincRNA	-	-
FBgn0266886	11.1729	24.6977	5.7991	0	2.93171	5.32858	13.8899	2.75343	2.35572	0.00855092	0.0385148	CR45347	2L	20562247	20575720	+	768	lincRNA	-	-
FBgn0261682	9.14145	20.746	20.2969	0.970877	8.79512	3.19715	16.7281	4.32105	1.95037	0.00855205	0.0385148	CG42729	3L	15526910	15527516	-	607	protein_coding	-	CBM_14
FBgn0033592	67.0373	29.6372	21.2634	15.534	15.6358	19.1829	39.3126	16.7842	1.22746	0.00902065	0.0401388	CG13215	2R	11239494	11240114	-	621	protein_coding	-	-
FBgn0053459	103.603	41.4921	33.8281	33.9807	18.5675	29.8401	59.6411	27.4627	1.11761	0.0090243	0.0401428	CG33459	2R	16488053	16489182	+	914	protein_coding	-	Trypsin
FBgn0010431	32.5029	65.2018	13.5312	15.534	12.7041	14.92	37.0787	14.386	1.36558	0.00903075	0.0401561	mtrm	3L	8413012	8414103	+	1092	protein_coding	-	-
FBgn0054038	12.1886	24.6977	20.2969	6.79614	3.90894	8.52573	19.061	6.41027	1.58026	0.00910107	0.0403851	CG34038	2R	25167659	25169855	+	1186	protein_coding	-	-
FBgn0036603	26.4086	16.7944	0.966517	2.91263	1.95447	3.19715	14.7232	2.68808	2.45422	0.0095116	0.0419118	CG13062	3L	16314285	16315149	+	801	protein_coding	-	-
FBgn0085466	17.2672	15.8065	10.6317	6.79614	1.95447	3.19715	14.5685	3.98259	1.86417	0.00960698	0.0422421	CG34437	3R	28283719	28284725	+	876	protein_coding	-	Trypsin
FBgn0037418	1.01572	16.7944	19.3303	1.94175	0.977235	3.19715	12.3802	2.03871	2.61749	0.00994321	0.0434701	Osi11	3R	6267591	6268757	-	1167	protein_coding	-	-
FBgn0065109	17.2672	23.7097	25.1294	7.76702	8.79512	9.59145	22.0355	8.71786	1.34126	0.0100182	0.043732	ppk11	2L	9773108	9775030	-	1551	protein_coding	-	-
FBgn0052302	176.735	142.258	314.118	66.9905	22.4764	103.375	211.037	64.2805	1.71638	0.0100309	0.0437478	CG32302	3L	2268825	2269903	+	1079	protein_coding	-	CBM_14
FBgn0051954	30.4715	33.5888	19.3303	10.6796	14.6585	10.6572	27.7969	11.9984	1.20893	0.0101499	0.0441485	CG31954	2L	3509058	3510102	-	978	protein_coding	-	Trypsin
FBgn0002633	8.12573	4.93953	3.86607	0.970877	0	0	5.64378	0.323626	3.97026	0.0105249	0.0454919	E(spl)m7-HLH	3R	26037038	26038019	+	982	protein_coding	-	HLH
FBgn0010040	6.0943	16.7944	14.4978	2.91263	3.90894	2.13143	12.4622	2.98434	2.05744	0.0106162	0.0457909	GstD4	3R	12374100	12374824	+	725	protein_coding	-	GST_N
FBgn0265695	5.07858	3.95162	7.73214	0	0	1.06572	5.58745	0.355239	3.95888	0.0106855	0.0460349	CR44502	X	7562905	7563485	-	581	lincRNA	-	-
FBgn0033312	20.3143	24.6977	9.66517	9.70877	3.90894	3.19715	18.2257	5.60495	1.69039	0.0109129	0.0468883	CG8642	2R	8611379	8614155	-	1803	protein_coding	-	Fibrinogen_C
FBgn0036229	5.07858	6.91534	20.2969	1.94175	2.93171	1.06572	10.7636	1.97973	2.43503	0.011161	0.0478134	CG7248	3L	11954083	11956780	+	2611	protein_coding	-	CBM_14
FBgn0067052	17.2672	25.6856	26.096	8.73789	3.90894	13.8543	23.0162	8.83372	1.39338	0.0114985	0.0489526	Rab9D	X	10589089	10589985	+	897	protein_coding	-	Ras

## Sheet: M_11538vsM_25C_deg_down
gene_id	M11538_1	M11538_2	M11538_3	M25C_1	M25C_2	M25C_3	M_11538	M_25C	log2FoldChange	pvalue	padj	gene_name	gene_chr	gene_start	gene_end	gene_strand	gene_length	gene_biotype	gene_description	tf_family
FBgn0038450	921.255	836.757	832.171	6134.97	6391.12	5511.89	863.394	6012.66	-2.80023	7.01054e-198	1.01632e-193	CG17560	3R	16617950	16619878	+	1712	protein_coding	-	NAD_binding_4
FBgn0034470	2711.96	2619.93	3208.84	8150.51	9483.09	8512.95	2846.91	8715.52	-1.61411	3.2464e-57	9.41262e-54	Obp56d	2R	19702924	19703915	-	922	protein_coding	-	-
FBgn0004047	212.285	258.831	313.152	1165.05	1094.5	1137.12	261.423	1132.23	-2.11348	1.58845e-56	3.83797e-53	Yp3	X	13759546	13761547	+	1868	protein_coding	-	Lipase
FBgn0052425	2659.14	2470.75	2289.68	5715.55	5746.14	6080.98	2473.19	5847.56	-1.24153	1.2352e-47	2.23834e-44	CG32425	3L	20497323	20514107	+	4295	protein_coding	-	-
FBgn0037396	271.196	236.11	211.667	861.168	839.445	1007.1	239.658	902.572	-1.91344	1.93898e-47	3.12327e-44	CG11459	3R	6025826	6027238	-	1413	protein_coding	-	Peptidase_C1
FBgn0038299	1745	2094.36	1882.78	4462.15	4577.37	4525.03	1907.38	4521.52	-1.24512	7.90544e-44	1.14605e-40	Spn88Eb	3R	15206703	15208762	-	1431	protein_coding	-	Serpin
FBgn0034512	49840.2	58528.5	56963.6	125127	121629	134877	55110.8	127211	-1.20681	2.64607e-43	3.48728e-40	CG18067	2R	20534245	20535835	+	1530	protein_coding	-	-
FBgn0032494	6173.52	5621.19	5963.41	12003.9	13261.1	12520	5919.37	12595	-1.08936	6.18426e-43	7.4711e-40	CG5945	2L	13239989	13241773	+	1079	protein_coding	-	-
FBgn0036106	20411.8	19482.5	21721.5	46035.1	54055.8	45473.1	20538.6	48521.3	-1.24028	6.77106e-42	7.55078e-39	CG6409	3L	10880699	10882386	-	1544	protein_coding	-	-
FBgn0051205	315.888	362.562	281.256	1081.56	1687.68	1687.03	319.902	1485.42	-2.21509	2.14957e-41	2.10033e-38	CG31205	3R	20731631	20732707	+	1020	protein_coding	-	Trypsin
FBgn0037697	180.797	161.029	181.705	601.944	585.364	561.633	174.51	582.98	-1.74043	2.61375e-41	2.36822e-38	GstZ2	3R	9456815	9460652	-	2325	protein_coding	-	-
FBgn0039628	864.374	772.543	731.653	2103.89	2600.42	2104.79	789.524	2269.7	-1.52385	1.67213e-40	1.34671e-37	CG11841	3R	29051056	29052267	+	1076	protein_coding	-	Trypsin
FBgn0039873	913.129	863.43	708.457	2420.4	2548.63	2103.72	828.339	2357.58	-1.50956	4.85643e-38	3.06103e-35	Smvt	3R	31759404	31761579	-	1996	protein_coding	-	-
FBgn0034331	10087.1	8166.03	9037.9	22171	19426.5	22223.4	9097	21273.6	-1.22561	1.06485e-35	5.51328e-33	CG15067	2R	18384824	18385589	-	711	protein_coding	-	-
FBgn0051326	1606.86	1891.84	1918.54	3756.32	4186.47	4057.18	1805.75	3999.99	-1.1472	1.11057e-32	4.35134e-30	CG31326	3R	14218136	14220205	-	1761	protein_coding	-	Trypsin
FBgn0038394	4.06286	6.91534	6.76562	212.622	143.654	149.2	5.91461	168.492	-4.82839	5.11152e-32	1.80736e-29	CG10264	3R	16043498	16044832	+	1047	protein_coding	-	-
FBgn0025583	11481.7	10710.9	12607.2	24362.2	22074.8	24283.4	11599.9	23573.5	-1.02302	1.81737e-31	6.12709e-29	IM2	2R	18386602	18387030	+	367	protein_coding	-	-
FBgn0262838	892.814	1104.48	1111.49	2811.66	2269.14	2568.38	1036.26	2549.73	-1.2987	3.90096e-29	1.13105e-26	CG43202	2R	18381393	18381844	-	390	protein_coding	-	-
FBgn0039629	287.448	279.577	274.491	649.517	698.723	768.382	280.505	705.541	-1.33027	2.68466e-28	6.94991e-26	CG11842	3R	29052680	29053913	+	1118	protein_coding	-	Trypsin
FBgn0032836	3395.54	2643.64	2437.56	7220.41	6594.38	6836.57	2825.58	6883.79	-1.28481	3.47254e-28	8.83183e-26	CG10680	2L	19964136	19965702	+	1272	protein_coding	-	-
FBgn0036876	597.241	516.675	512.254	1151.46	1202.98	1188.27	542.057	1180.9	-1.12377	2.02912e-27	4.61695e-25	CG9451	3L	19498197	19500798	-	1592	protein_coding	-	Acid_phosphat_A
FBgn0262563	547.471	515.687	485.192	1135.93	1050.53	1119	516.117	1101.82	-1.09439	9.6948e-27	2.03689e-24	CG43103	2R	17139450	17139931	-	482	protein_coding	-	-
FBgn0034511	14407.9	14704	17759.8	35257.4	30519	32750.5	15623.9	32842.3	-1.07178	1.03458e-26	2.11738e-24	GNBP-like3	2R	20526311	20526825	+	515	protein_coding	-	-
FBgn0017448	308.778	339.84	257.094	772.818	866.807	749.199	301.904	796.275	-1.3999	1.037e-26	2.11738e-24	CG2187	3R	31755356	31758637	-	2580	protein_coding	-	-
FBgn0033446	9453.27	8131.46	7653.85	17085.5	21192.3	17746.3	8412.86	18674.7	-1.15047	2.44554e-26	4.85658e-24	CG1648	2R	9810974	9820053	-	1443	protein_coding	-	-
FBgn0036766	1132.52	968.148	1069.93	2090.3	2676.65	2308.34	1056.87	2358.43	-1.15814	5.41978e-25	9.46633e-23	CG5506	3L	17883649	17884376	-	661	protein_coding	-	-
FBgn0034329	16672	21346.7	23567.6	46273	44742.7	49256.4	20528.7	46757.3	-1.18752	9.17986e-25	1.56565e-22	IM1	2R	18383949	18384378	+	361	protein_coding	-	-
FBgn0264979	901.956	935.547	1166.59	2200.98	2180.21	2088.8	1001.36	2156.66	-1.10658	6.56195e-24	1.08101e-21	CG4267	2L	2242378	2245274	+	2182	protein_coding	-	Lipase
FBgn0038631	1755.16	1683.39	2338	4158.27	5345.48	4777.61	1925.52	4760.45	-1.3057	3.30156e-23	5.14653e-21	CG7695	3R	18616754	18617511	-	693	protein_coding	-	-
FBgn0034140	1010.64	970.124	818.64	1912.63	1813.75	2023.8	933.134	1916.72	-1.03864	4.43112e-23	6.76188e-21	CG8317	2R	16574579	16576586	-	2008	protein_coding	-	-
FBgn0033065	466.214	299.336	282.223	1064.08	1038.8	1012.43	349.257	1038.44	-1.57306	1.0592e-22	1.56686e-20	Cyp6w1	2R	6173684	6176195	+	2392	protein_coding	-	p450
FBgn0052750	121.886	151.15	210.701	558.254	580.478	478.507	161.245	539.08	-1.74008	1.21384e-22	1.77748e-20	CG32750	X	6194737	6196439	-	1645	protein_coding	-	CN_hydrolase
FBgn0053329	419.491	473.207	497.756	1000	955.736	939.962	463.485	965.234	-1.05803	1.37772e-22	1.99728e-20	Sp212	3R	14222074	14224155	-	1681	protein_coding	-	Trypsin
FBgn0036419	216.348	238.085	263.859	565.051	846.286	984.722	239.431	798.686	-1.737	3.33279e-22	4.69083e-20	CG13482	3L	14329346	14329885	+	540	protein_coding	-	-
FBgn0038449	1164.01	802.18	686.227	2444.67	2538.86	2279.57	884.139	2421.03	-1.45377	2.72035e-21	3.65156e-19	CG17562	3R	16615309	16617154	+	1674	protein_coding	-	NAD_binding_4
FBgn0262538	559.66	457.401	490.024	978.644	1060.3	1106.21	502.361	1048.39	-1.06146	6.03531e-21	7.6749e-19	CG43092	3R	22768883	22769667	-	722	protein_coding	-	-
FBgn0054054	186.892	195.605	211.667	503.885	428.029	516.873	198.055	482.929	-1.28496	2.62624e-20	3.07037e-18	CG34054	2R	11409810	11410438	-	545	protein_coding	-	-
FBgn0035661	1456.54	906.898	933.655	3293.22	2857.44	2723.97	1099.03	2958.21	-1.42887	4.26078e-20	4.82566e-18	CG10477	3L	6033199	6034611	-	1361	protein_coding	-	Trypsin
FBgn0067905	725.221	858.49	793.511	1426.22	1695.5	1791.47	792.407	1637.73	-1.04694	5.46897e-20	6.00634e-18	IM14	2R	20870392	20870678	+	223	protein_coding	-	-
FBgn0035583	168.609	203.509	247.428	500.973	677.224	565.896	206.515	581.364	-1.49222	8.74843e-20	9.32544e-18	CG13704	3L	4898900	4900869	+	682	protein_coding	-	-
FBgn0039769	631.775	529.518	405.937	1251.46	1210.79	1292.71	522.41	1251.66	-1.26117	1.55309e-19	1.63153e-17	CG15534	3R	30432064	30435139	+	2164	protein_coding	-	Metallophos
FBgn0025827	347.375	305.263	435.899	783.498	900.033	872.822	362.846	852.118	-1.23108	3.97592e-19	4.05908e-17	CG6421	2R	16872250	16872906	+	600	protein_coding	-	-
FBgn0039040	431.679	350.707	401.105	771.847	906.874	808.879	394.497	829.2	-1.07205	1.44035e-18	1.37374e-16	CG13833	3R	23033284	23035563	-	1076	protein_coding	-	adh_short
FBgn0034139	210.253	229.194	258.06	472.817	569.728	557.37	232.503	533.305	-1.19669	5.57843e-18	5.11839e-16	CG4927	2R	16572082	16574154	+	1449	protein_coding	-	Trypsin
FBgn0029769	438.789	358.61	338.281	817.479	816.968	750.265	378.56	794.904	-1.07127	9.18905e-18	8.22306e-16	frma	X	5493014	5496052	-	2975	protein_coding	-	-
FBgn0262537	201.112	146.21	212.634	459.225	563.865	452.93	186.652	492.006	-1.39859	1.14576e-17	1.01281e-15	CG43091	3R	22768121	22768733	-	549	protein_coding	-	-
FBgn0052695	289.479	301.311	365.343	711.653	696.769	623.444	318.711	677.289	-1.08732	3.45471e-17	2.82954e-15	CG32695	X	9872382	9874057	-	1613	protein_coding	-	-
FBgn0039656	305.731	332.924	301.553	576.701	672.338	705.505	313.403	651.514	-1.05524	4.80234e-17	3.88936e-15	CG11951	3R	29235322	29238704	-	2707	protein_coding	-	-
FBgn0000473	245.803	201.533	237.763	472.817	537.479	482.77	228.366	497.689	-1.12426	9.6059e-17	7.69374e-15	Cyp6a2	2R	6779749	6781491	-	1674	protein_coding	-	p450
FBgn0030482	708.97	961.233	1054.47	2052.43	1874.34	1850.08	908.224	1925.62	-1.08389	2.29344e-16	1.76851e-14	CG1673	X	13396899	13401224	+	2510	protein_coding	-	-
FBgn0043530	2468.19	1502.61	1532.9	4216.52	4537.3	4456.83	1834.56	4403.55	-1.26342	2.67279e-16	2.01809e-14	Obp51a	2R	15024375	15024839	-	398	protein_coding	-	-
FBgn0030925	530.204	622.381	710.39	1328.16	1316.34	1123.27	620.992	1255.92	-1.01597	4.17656e-16	3.07348e-14	Hayan	X	18479983	18483772	-	2408	protein_coding	-	Trypsin
FBgn0263081	307.762	249.94	339.247	583.497	717.29	791.828	298.983	697.538	-1.22144	5.48437e-16	3.99533e-14	CG43349	2L	1200205	1200663	+	459	protein_coding	-	-
FBgn0039872	707.954	1124.24	844.736	1867.97	2078.58	1970.51	892.309	1972.35	-1.14413	6.61117e-16	4.76116e-14	salt	3R	31751825	31754705	-	2114	protein_coding	-	-
FBgn0038702	1120.33	828.853	873.731	2115.54	1681.82	2084.54	940.973	1960.63	-1.05927	7.54004e-16	5.25519e-14	CG3739	3R	19393360	19395188	+	1586	protein_coding	-	Peptidase_S28
FBgn0030773	457.072	234.134	378.875	845.634	1101.34	1110.48	356.694	1019.15	-1.51477	1.1927e-15	8.04212e-14	CG9676	X	16699152	16700170	-	964	protein_coding	-	Trypsin
FBgn0037126	565.754	613.49	900.794	1420.39	1717.98	1815.98	693.346	1651.45	-1.25149	2.0872e-15	1.38799e-13	CG14567	3L	21737706	21738430	-	725	protein_coding	-	-
FBgn0039564	447.931	573.974	695.892	1236.9	1202	1238.36	572.599	1225.75	-1.09742	2.42708e-15	1.59934e-13	CG5527	3R	27954917	27957326	+	2346	protein_coding	-	-
FBgn0034165	237.678	255.868	189.437	464.079	497.413	530.727	227.661	497.406	-1.12773	3.94638e-15	2.53145e-13	CG6435	2R	16873772	16874977	+	794	protein_coding	-	-
FBgn0050026	804.447	571.998	560.58	1534.96	1217.63	1703.02	645.675	1485.2	-1.20194	6.26664e-15	3.95158e-13	CG30026	2R	11408576	11409449	-	821	protein_coding	-	-
FBgn0027584	8790.01	6410.52	5752.71	14693.3	12990.4	16731.8	6984.41	14805.1	-1.08391	1.70534e-14	1.01738e-12	CG4757	3R	11161207	11163498	+	2098	protein_coding	-	COesterase
FBgn0033366	345.343	364.537	221.332	755.342	707.518	721.49	310.404	728.117	-1.2308	1.80257e-14	1.06227e-12	Ance-4	2R	9039728	9042142	-	2008	protein_coding	-	Peptidase_M2
FBgn0035611	179.782	114.597	117.915	342.72	382.099	341.029	137.431	355.283	-1.37205	2.95326e-14	1.71941e-12	CG13285	3L	5533968	5535759	-	1227	protein_coding	-	-
FBgn0037488	99.5402	77.0567	64.7566	195.146	297.079	257.903	80.4512	250.043	-1.63742	3.46403e-14	1.96934e-12	CG14607	3R	7241760	7244006	+	1472	protein_coding	-	CBM_14
FBgn0038930	4106.54	3262.07	2537.11	6324.29	6992.12	7451.49	3301.9	6922.63	-1.06811	3.94876e-14	2.21881e-12	CG5778	3R	22085374	22086397	-	657	protein_coding	-	-
FBgn0262539	650.058	414.921	551.881	1031.07	1181.48	1320.42	538.953	1177.66	-1.12767	1.08094e-13	5.76115e-12	CG43093	3R	22769775	22770307	-	476	protein_coding	-	-
FBgn0033067	95.4773	40.5042	81.1874	210.68	265.808	307.992	72.3896	261.493	-1.85297	1.71449e-13	8.87679e-12	CG11211	2R	6180926	6181626	-	593	protein_coding	-	Lectin_C
FBgn0039471	2230.51	2130.91	1487.47	5175.75	3760.4	3804.61	1949.63	4246.92	-1.12342	2.22099e-13	1.12974e-11	CG6295	3R	27005899	27007055	-	1091	protein_coding	-	Lipase
FBgn0085325	103.603	87.9237	129.513	249.515	263.853	343.161	107.013	285.51	-1.41366	3.49409e-13	1.75273e-11	CG34296	3R	29722538	29723013	+	420	protein_coding	-	-
FBgn0262108	26.4086	28.6493	65.7232	193.205	151.471	171.58	40.2604	172.085	-2.09181	5.18932e-13	2.58521e-11	CR42861	X	13744928	13745476	+	549	lincRNA	-	-
FBgn0038484	131.027	138.307	141.111	272.816	308.806	301.598	136.815	294.407	-1.10496	6.60917e-13	3.20445e-11	CG5246	3R	17136111	17137195	+	1085	protein_coding	-	Trypsin
FBgn0013772	65.0058	60.2623	66.6897	160.195	174.925	181.172	63.9859	172.097	-1.4267	9.28252e-13	4.39767e-11	Cyp6a8	2R	14887171	14889010	-	1781	protein_coding	-	p450
FBgn0259229	97.5087	79.0325	100.518	202.913	243.332	226.998	92.353	224.414	-1.2807	2.9998e-12	1.34638e-10	CG42329	2L	1219293	1229802	+	2477	protein_coding	-	-
FBgn0030597	55.8644	44.4558	29.962	143.69	131.927	155.595	43.4274	143.737	-1.72918	3.64708e-12	1.60704e-10	Eo	X	14916756	14918800	-	2045	protein_coding	-	-
FBgn0266569	1047.2	622.381	1124.06	2103.89	1993.56	2077.08	931.215	2058.18	-1.14415	3.67228e-12	1.61324e-10	CG42259	X	1046224	1047009	+	711	protein_coding	-	-
FBgn0031694	82.273	60.2623	58.9575	173.787	193.493	173.712	67.1643	180.33	-1.42698	4.80375e-12	2.06647e-10	Cyp4ac2	2L	5266392	5268455	+	1709	protein_coding	-	p450
FBgn0039091	7.11001	6.91534	7.73214	45.6312	70.3609	54.3516	7.2525	56.7812	-2.96847	2.63442e-11	1.02389e-09	CG10182	3R	23587120	23589819	-	2212	protein_coding	-	-
FBgn0034328	4455.95	7787.66	7006.28	13437.9	11778.6	14473.5	6416.63	13230	-1.04387	3.71325e-11	1.4166e-09	IM23	2R	18382704	18383235	-	468	protein_coding	-	-
FBgn0037485	164.546	165.968	228.098	358.254	428.029	385.789	186.204	390.691	-1.06816	4.26041e-11	1.61261e-09	CG14606	3R	7214339	7217083	-	1925	protein_coding	-	Sugar_tr
FBgn0036970	1851.65	1091.64	1006.14	5218.46	4779.66	5064.29	1316.48	5020.8	-1.93133	7.03929e-11	2.56148e-09	Spn77Bc	3L	20342634	20344319	+	1440	protein_coding	-	Serpin
FBgn0034276	165.562	215.364	259.993	443.691	398.712	542.45	213.639	461.618	-1.10969	2.58311e-10	8.5692e-09	Sardh	2R	17753555	17756422	-	2750	protein_coding	-	DAO
FBgn0036022	1009.62	874.297	1393.72	1762.14	2299.43	2580.1	1092.55	2213.89	-1.01853	5.71242e-10	1.8042e-08	CG8329	3L	9638112	9639021	+	910	protein_coding	-	Trypsin
FBgn0026878	124.933	100.766	87.9531	243.69	214.992	220.603	104.551	226.428	-1.11663	1.18263e-09	3.58672e-08	CG4325	X	2042730	2043818	-	897	protein_coding	-	-
FBgn0263502	108.682	122.5	119.848	248.545	204.242	298.401	117.01	250.396	-1.09575	3.24862e-09	9.25249e-08	CR43491	X	17378376	17379004	-	629	lincRNA	-	-
FBgn0267576	16.2515	14.8186	18.3638	76.6993	65.4747	57.5487	16.478	66.5742	-2.01513	4.58336e-09	1.27779e-07	CR45916	3L	19562636	19566533	+	3898	lincRNA	-	-
FBgn0053665	69.0687	68.1655	90.8526	141.748	193.493	254.706	76.0289	196.649	-1.3682	8.70737e-09	2.30769e-07	CG33665	X	6478138	6478849	-	653	protein_coding	-	-
FBgn0037144	151.342	112.621	106.317	235.923	263.853	252.575	123.427	250.784	-1.02415	8.88405e-09	2.35022e-07	CG7458	3L	21955110	21958041	+	2166	protein_coding	-	Sugar_tr
FBgn0262022	97.5087	71.1292	91.8191	184.467	180.788	192.895	86.819	186.05	-1.09965	9.96269e-09	2.59765e-07	CG42833	3L	20200093	20200487	+	395	protein_coding	-	-
FBgn0036951	42.6601	51.3711	94.7187	184.467	211.083	147.069	62.9166	180.873	-1.52176	1.39259e-08	3.51103e-07	CG7017	3L	20210292	20212122	-	1560	protein_coding	-	CBM_14
FBgn0036767	71.1001	74.093	84.087	117.476	287.307	269.626	76.4267	224.803	-1.55523	2.34602e-08	5.72562e-07	CG16775	3L	17885948	17886645	-	698	protein_coding	-	-
FBgn0053109	173.687	274.638	163.341	440.778	367.44	436.944	203.889	415.054	-1.02533	3.98084e-08	9.44521e-07	CG33109	3R	14220560	14221584	-	1025	protein_coding	-	-
FBgn0036359	112.744	122.5	85.0535	209.709	218.901	213.143	106.766	213.918	-1.00363	4.87161e-08	1.12279e-06	CG14105	3L	13425891	13426673	-	666	protein_coding	-	-
FBgn0033835	257.992	305.263	541.25	1290.3	1307.54	1187.21	368.168	1261.68	-1.77663	5.54617e-08	1.26419e-06	IM10	2R	13407011	13408358	+	1160	protein_coding	-	-
FBgn0260000	78.2101	87.9237	74.4218	154.369	161.244	179.04	80.1852	164.885	-1.03927	1.01586e-07	2.22126e-06	CG17570	2L	20263419	20264424	-	1006	protein_coding	-	-
FBgn0034160	42.6601	90.8874	62.8236	118.447	232.582	219.538	65.457	190.189	-1.53709	1.04175e-07	2.2676e-06	CG5550	2R	16816589	16817577	+	938	protein_coding	-	Fibrinogen_C
FBgn0044872	33.5186	48.4074	22.2299	101.942	101.632	92.7174	34.7186	98.764	-1.51016	1.85503e-07	3.85831e-06	FucTC	X	23008766	23011303	-	2001	protein_coding	-	-
FBgn0250841	1147.76	650.042	517.087	2503.89	2806.62	2893.42	771.629	2734.64	-1.8255	5.08803e-07	9.75677e-06	CG17242	2L	2268106	2269140	-	1035	protein_coding	-	Trypsin
FBgn0265428	8.12573	3.95162	5.7991	33.0098	26.3853	39.4315	5.95882	32.9422	-2.46811	2.85586e-06	4.59505e-05	CR44340	X	19495284	19495896	-	613	lincRNA	-	-
FBgn0051664	52.8172	51.3711	81.1874	113.593	140.722	151.332	61.7919	135.215	-1.1269	3.34847e-06	5.27066e-05	CG31664	2L	1824172	1826500	-	2075	protein_coding	-	-
FBgn0263025	100.556	79.0325	72.4888	997.091	220.855	571.224	84.0257	596.39	-2.82755	3.50335e-06	5.4906e-05	CG43320	3R	27695235	27696531	+	1297	protein_coding	-	-
FBgn0030590	28.4401	40.5042	41.5602	89.3207	85.0194	88.4545	36.8348	87.5982	-1.24778	3.64188e-06	5.66484e-05	CG9518	X	14862989	14871181	-	3952	protein_coding	-	-
FBgn0052745	10.1572	17.7823	19.3303	49.5147	53.7479	47.9573	15.7566	50.4066	-1.67453	8.57649e-06	0.000122375	CR32745	X	6280233	6280752	-	471	pseudogene	-	-
FBgn0004854	47.7387	47.4195	49.2924	113.593	85.9967	106.572	48.1502	102.054	-1.08317	1.01567e-05	0.000141307	B-H2	X	17314581	17324175	+	3142	protein_coding	-	-
FBgn0036754	52.8172	58.2865	49.2924	119.418	101.632	103.375	53.4654	108.142	-1.01711	1.30913e-05	0.000174435	CG5589	3L	17802490	17804715	-	2112	protein_coding	-	DEAD
FBgn0030828	4918.1	2947.91	2262.62	9126.25	9314.03	9387.9	3376.21	9276.06	-1.45814	1.8093e-05	0.000231708	CG5162	X	17215304	17217365	+	1533	protein_coding	-	Lipase
FBgn0030200	24.3772	33.5888	25.1294	56.3109	77.2016	71.403	27.6985	68.3052	-1.3013	2.75543e-05	0.000335394	RabX2	X	10417429	10418219	+	791	protein_coding	-	Ras
FBgn0029813	16.2515	10.867	9.66517	30.0972	41.0439	56.483	12.2612	42.5414	-1.79477	3.81006e-05	0.000441523	CG15766	X	5814864	5815820	-	957	protein_coding	-	Acetyltransf_1
FBgn0035434	802.416	1116.33	1426.58	1921.37	3370.48	3394.31	1115.11	2895.39	-1.37646	4.1621e-05	0.00047698	Drsl5	3L	3316781	3317144	+	364	protein_coding	-	-
FBgn0040363	33.5186	44.4558	23.1964	82.5246	64.4975	94.8488	33.7236	80.6236	-1.25713	4.36961e-05	0.000496056	CG11384	X	1173877	1176035	-	2159	protein_coding	-	-
FBgn0035642	0	0	0	8.73789	7.81788	13.8543	0	10.1367	-5.79583	4.64891e-05	0.000523254	CG18586	3L	5873311	5875466	+	2047	protein_coding	-	AMP-binding
FBgn0033943	38.5972	41.4921	24.1629	41.7477	191.538	102.309	34.7507	111.865	-1.68776	5.09946e-05	0.000566793	CG12869	2R	14591203	14595617	+	3339	protein_coding	-	COesterase
FBgn0035279	30.4715	32.6009	44.4598	96.1168	62.543	85.2573	35.8441	81.3057	-1.17951	6.16153e-05	0.00066313	Cpr62Ba	3L	1824129	1831783	-	972	protein_coding	-	Chitin_bind_4
FBgn0083027	37.5815	28.6493	35.7611	73.7867	78.1788	69.2716	33.9973	73.7457	-1.11823	7.18688e-05	0.000758836	snoRNA:Psi18S-531	X	763083	763234	-	152	snoRNA	-	-
FBgn0015543	21.33	19.7581	18.3638	42.7186	51.7935	59.6801	19.8173	51.3974	-1.37385	8.98081e-05	0.000921407	snoRNA:Me28S-A1322	2R	11893123	11893195	+	73	snoRNA	-	-
FBgn0050272	19.2986	25.6856	17.3973	75.7284	34.2032	59.6801	20.7938	56.5373	-1.44309	0.000164752	0.0015429	CG30272	2R	22829644	22831877	+	1699	protein_coding	-	MFS_1
FBgn0262816	12.1886	11.8549	10.6317	29.1263	48.8618	30.9058	11.5584	36.298	-1.65311	0.000200949	0.00183102	CG43187	2R	16380516	16385765	+	5093	protein_coding	-	-
FBgn0265267	768.897	465.304	385.64	1266.02	1096.46	1160.57	539.947	1174.35	-1.12122	0.000227066	0.00202613	CG18258	X	17212307	17213977	+	1497	protein_coding	-	Lipase
FBgn0016047	37.5815	33.5888	45.4263	66.9905	85.0194	84.1916	38.8655	78.7339	-1.01669	0.000231784	0.00205641	nompA	2R	11310335	11318676	-	5235	protein_coding	-	PAN_1
FBgn0262540	17.2672	13.8307	27.0625	33.9807	72.3154	52.2201	19.3868	52.8387	-1.44424	0.000316716	0.00264789	CG43094	3R	22770613	22770987	-	310	protein_coding	-	-
FBgn0034440	29.4558	27.6614	27.0625	53.3982	54.7252	76.7316	28.0599	61.6183	-1.1325	0.000339235	0.00280444	CG10073	2R	19380543	19384965	+	2824	protein_coding	-	-
FBgn0053470	726.237	1272.42	1988.13	3377.68	3484.82	3994.31	1328.93	3618.94	-1.44522	0.00034001	0.00280542	CG33470	2R	13411739	13413085	+	1159	protein_coding	-	-
FBgn0030641	6.0943	5.92744	12.5647	26.2137	21.4992	38.3658	8.19549	28.6929	-1.80001	0.000594561	0.00447758	CG6299	X	15462722	15466812	+	3018	protein_coding	-	-
FBgn0053509	9.14145	10.867	7.73214	21.3593	32.2488	33.0372	9.24685	28.8818	-1.64217	0.000747519	0.00539432	CG33509	2L	21084605	21086506	-	1405	protein_coding	-	-
FBgn0052823	34.5343	49.3953	47.3593	119.418	63.5203	79.9288	43.763	87.6223	-1.00133	0.000833389	0.00586487	Sdic3	X	20189440	20194227	-	2361	protein_coding	-	-
FBgn0266945	5.07858	3.95162	16.4308	25.2428	34.2032	29.8401	8.487	29.762	-1.80311	0.000917306	0.00634758	CR45396	3L	15142131	15142800	+	670	lincRNA	-	-
FBgn0264960	1.01572	1.97581	3.86607	13.5923	13.6813	15.9858	2.28587	14.4198	-2.6464	0.00104409	0.00706641	CR44129	X	16815495	16815945	-	321	lincRNA	-	-
FBgn0265541	729.284	345.767	346.98	1140.78	1005.57	1115.81	474.01	1087.39	-1.19808	0.00111026	0.00743779	CR44391	2R	17135595	17136325	+	731	pseudogene	-	-
FBgn0266096	2.03143	0.987906	4.83259	19.4175	19.5447	8.52573	2.61731	15.8293	-2.59337	0.00119482	0.00790928	CR44833	X	4956646	5063868	-	446	lincRNA	-	-
FBgn0019938	324.013	330.949	394.339	494.176	1548.92	854.705	349.767	965.933	-1.46551	0.0018183	0.0111553	RpI1	2R	14595611	14601216	-	5078	protein_coding	-	-
FBgn0052581	62.9744	211.412	357.611	840.78	847.263	779.039	210.666	822.36	-1.96457	0.00269156	0.0152539	CG32581	X	15796908	15799162	-	1428	protein_coding	-	-
FBgn0030439	3.04715	0.987906	4.83259	14.5632	13.6813	14.92	2.95588	14.3882	-2.27904	0.00276895	0.0156071	CG12716	X	12974683	12976231	-	1359	protein_coding	-	-
FBgn0260477	6.0943	5.92744	6.76562	17.4758	17.5902	26.6429	6.26245	20.5696	-1.71164	0.00293194	0.0163039	CG30283	2R	21539584	21540573	-	822	protein_coding	-	Trypsin
FBgn0263380	16.2515	10.867	17.3973	29.1263	36.1577	39.4315	14.8386	34.9052	-1.23221	0.00305761	0.016909	CR43432	3L	14976626	14977631	-	1006	lincRNA	-	-
FBgn0039470	9.14145	17.7823	3.86607	64.0779	19.5447	20.2486	10.2633	34.6237	-1.75855	0.00326724	0.01784	CG6296	3R	27003236	27005469	-	2127	protein_coding	-	Lipase
FBgn0037577	17.2672	46.4316	58.9575	89.3207	121.177	54.3516	40.8854	88.2831	-1.10974	0.00373316	0.0199054	CG7443	3R	8324316	8325036	+	616	protein_coding	-	-
FBgn0260768	7.11001	21.7339	15.4643	32.0389	39.0894	36.2344	14.7694	35.7876	-1.27353	0.00382248	0.0202612	CG42566	2R	22661934	22663241	+	873	protein_coding	-	-
FBgn0263501	26.4086	9.87906	16.4308	39.806	36.1577	42.6287	17.5728	39.5308	-1.17189	0.00449026	0.0232732	CR43490	3R	17287788	17288818	+	1031	lincRNA	-	-
FBgn0038525	9.14145	25.6856	20.2969	42.7186	39.0894	40.4972	18.3746	40.7684	-1.1467	0.00478629	0.0244406	CG14329	3R	17609359	17610533	+	1103	protein_coding	-	-
FBgn0262007	223.458	237.097	283.19	363.108	1135.55	490.23	247.915	662.962	-1.4191	0.00505857	0.0255876	CG42825	3L	10095754	10098115	-	1752	protein_coding	-	Sugar_tr
FBgn0032094	17.2672	19.7581	18.3638	38.8351	32.2488	44.7601	18.463	38.6146	-1.06222	0.00520714	0.0261204	CG12439	2L	9077121	9077988	+	868	protein_coding	-	-
FBgn0265674	18.2829	15.8065	38.6607	48.5439	46.9073	56.483	24.25	50.6447	-1.05796	0.00521595	0.0261465	CR44481	2L	11665241	11665810	+	570	lincRNA	-	-
FBgn0267562	4.06286	21.7339	27.0625	28.1554	53.7479	55.4173	17.6198	45.7735	-1.37132	0.00556529	0.0276396	CR45902	3R	6834343	6834967	-	625	lincRNA	-	-
FBgn0036757	20.3143	36.5525	17.3973	63.107	47.8845	39.4315	24.7547	50.141	-1.02068	0.00653269	0.0312659	Ir75a	3L	17815570	17817921	-	1982	protein_coding	-	Lig_chan
FBgn0264295	16.2515	8.89116	8.69865	19.4175	28.3398	37.3001	11.2804	28.3525	-1.32988	0.0068142	0.0322934	CG43773	2L	4007690	4007984	+	295	protein_coding	-	-
FBgn0267305	0	0	0	2.91263	2.93171	7.46002	0	4.43478	-4.60063	0.00687742	0.0325398	CR45741	3L	5316213	5316451	-	239	lincRNA	-	-
FBgn0053337	2.03143	8.89116	9.66517	12.6214	22.4764	30.9058	6.86259	22.0012	-1.67102	0.00695193	0.0327719	CG33337	3R	23590141	23592769	-	2127	protein_coding	-	-
FBgn0034326	5.07858	4.93953	11.5982	12.6214	32.2488	20.2486	7.20544	21.7063	-1.58667	0.00844806	0.0381888	CG18540	2R	18299317	18300072	+	627	protein_coding	-	-
FBgn0036324	10.1572	13.8307	9.66517	28.1554	31.2715	20.2486	11.2177	26.5585	-1.24628	0.0086815	0.0389388	CG12520	3L	12901247	12902737	-	1427	protein_coding	-	-
FBgn0086662	6.0943	5.92744	3.86607	18.4467	15.6358	14.92	5.29593	16.3342	-1.62868	0.00945825	0.0417147	snoRNA:Psi28S-3186	3R	5598015	5598157	-	143	snoRNA	-	-
FBgn0265580	2.03143	1.97581	3.86607	10.6796	11.7268	11.7229	2.62444	11.3765	-2.11075	0.00953873	0.041993	CR44407	2L	10710101	10710733	+	633	lincRNA	-	-
FBgn0265670	10.1572	20.746	26.096	44.6603	29.3171	46.8915	18.9997	40.2896	-1.07916	0.00956374	0.0420775	CG44477	2L	11663259	11663872	+	614	protein_coding	-	-
FBgn0082974	2.03143	0	0	7.76702	6.84065	7.46002	0.677144	7.35589	-3.46951	0.00984885	0.0431617	snoRNA:Psi28S-3305c	3R	28603371	28603522	+	152	snoRNA	-	-
FBgn0036950	1.01572	1.97581	4.83259	7.76702	21.4992	7.46002	2.60804	12.2421	-2.2247	0.0109746	0.0470569	CG6996	3L	20207534	20209600	+	1828	protein_coding	-	CBM_14
FBgn0267087	4.06286	3.95162	4.83259	3.88351	57.6569	3.19715	4.28236	21.5792	-2.33548	0.0112593	0.0481777	CR45531	X	6860339	6863235	+	2897	lincRNA	-	-
FBgn0083015	6.0943	8.89116	14.4978	19.4175	21.4992	33.0372	9.82774	24.6513	-1.31859	0.0114902	0.0489526	snoRNA:Psi18S-920	3L	11822984	11823124	+	141	snoRNA	-	-
